1 **General decapping activators target different subsets of**  
2 **inefficiently translated mRNAs**

3  
4  
5 Feng He<sup>1</sup>, Alper Celik<sup>1,2</sup>, and Allan Jacobson\*

6  
7 Department of Microbiology and Physiological Systems  
8 University of Massachusetts Medical School  
9 368 Plantation Street  
10 Worcester, MA 01655  
11  
12  
13

14 **Running title:** Selective mRNA targeting by the yeast decapping enzyme

15 **Keywords:** Dcp1-Dcp2, decapping enzyme, decapping activators,  
16 mRNA decay substrates

17  
18  
19  
20 \*corresponding author

21 [allan.jacobson@umassmed.edu](mailto:allan.jacobson@umassmed.edu)

22 1-508-856-2442

23  
24 <sup>1</sup>Co-first authors

25 <sup>2</sup>Present address:

26 Indoc Research

27 258 Adelaide St. E.

28 Toronto, ON, M5A 1N1

29 **Abstract**

30           The Dcp1-Dcp2 decapping enzyme and the decapping activators Pat1, Dhh1, and  
31 Lsm1 regulate mRNA decapping, but their mechanistic integration is unknown. We analyzed  
32 the gene expression consequences of deleting *PAT1*, *LSM1*, or *DHH1*, or the *DCP2* C-  
33 terminal domain, and found that: i) the Dcp2 C-terminal domain is an effector of both negative  
34 and positive regulation; ii) rather than being global activators of decapping, Pat1, Lsm1, and  
35 Dhh1 directly target specific subsets of yeast mRNAs and loss of the functions of each of  
36 these factors has substantial indirect consequences for genome-wide mRNA expression; and  
37 iii) transcripts targeted by Pat1, Lsm1, and Dhh1 exhibit only partial overlap, are generally  
38 translated inefficiently, and, as expected, are targeted to decapping-dependent decay. Our  
39 results define the roles of Pat1, Lsm1, and Dhh1 in decapping of general mRNAs and  
40 suggest that these factors may monitor mRNA translation and target unique features of  
41 individual mRNAs.

## 42 INTRODUCTION

43 Decapping commits an mRNA to complete degradation and plays an important role in  
44 eukaryotic cytoplasmic mRNA turnover (Valkov et al., 2017, Grudzien-Nogalska and  
45 Kiledjian, 2017, Parker, 2012). Decapping is required for general 5' to 3' mRNA decay  
46 (Decker and Parker, 1993), nonsense-mediated mRNA decay (NMD) (He and Jacobson,  
47 2001), AU-rich element-mediated mRNA decay (Yamashita et al., 2005, Fenger-Gron et al.,  
48 2005), microRNA-mediated gene silencing (Behm-Ansmant et al., 2006), and transcript-  
49 specific degradation (Dong et al., 2007, Badis et al., 2004). In yeast, mRNA decapping is  
50 carried out by a single enzyme comprised of a regulatory subunit (Dcp1) and a catalytic  
51 subunit (Dcp2). Dcp1 is a small EVH domain protein essential for mRNA decapping *in vivo*  
52 (She et al., 2004, Beelman et al., 1996). Dcp2 is a 970-amino acid protein containing a highly  
53 conserved Nudix domain at its N-terminus and a large extension at its C-terminus (Gaudon et  
54 al., 1999, Dunckley and Parker, 1999). The Dcp2 N-terminal domain is essential for the  
55 catalysis of cap removal, but may also have additional regulatory activity, as this domain also  
56 contains the binding site for Dcp1 (She et al., 2008, Deshmukh et al., 2008). The decapping  
57 role of the Dcp2 C-terminal domain is largely unknown. However, our recent experiments  
58 reveal that this domain includes both negative and positive regulatory elements that control  
59 both the substrate specificity and the activation of the decapping enzyme (He and Jacobson,  
60 2015a).

61 In addition to the Dcp1-Dcp2 decapping enzyme, mRNA decapping also requires the  
62 functions of specific regulators commonly dubbed “decapping activators” (Parker, 2012). A  
63 large number of decapping activators have been identified in yeast and other organisms  
64 (Jonas and Izaurralde, 2013, Parker, 2012), and these factors appear to target distinct

65 classes of mRNA substrates. Pat1, Dhh1, and the Lsm1-7 complex are required for  
66 decapping of general wild-type mRNAs (Parker, 2012), and NMD-specific regulators (Upf1,  
67 Upf2, and Upf3) are required for decapping of nonsense-containing mRNAs (He and  
68 Jacobson, 2015b, Nicholson and Muhlemann, 2010). Edc3 manifests the most fastidious  
69 substrate specificity, being required for decapping of only the yeast *YRA1* pre-mRNA and  
70 *RPS28B* mRNA (He et al., 2014, Dong et al., 2007, Badis et al., 2004). All of these decapping  
71 activators are conserved from yeast to humans, but their precise functions in mRNA  
72 decapping regulation are largely unknown. The two major functions proposed for yeast  
73 decapping activators, translational repression and decapping enzyme activation (Parker,  
74 2012, Nissan et al., 2010, Collier and Parker, 2005), are still controversial (Sweet et al., 2012,  
75 Arribere et al., 2011).

76 Yeast decapping activators exhibit highly specific interactions with each other and with  
77 the decapping enzyme. Pat1 interacts with both Dhh1 and the Lsm1-7 complex (He and  
78 Jacobson, 2015a, Sharif et al., 2013, Sharif and Conti, 2013, Nissan et al., 2010, Bouveret et  
79 al., 2000, Wu et al., 2014), Upf1, Upf2, and Upf3 interact with each other (He et al., 1997),  
80 and Edc3 interacts with Dhh1 (He and Jacobson, 2015a, Sharif et al., 2013). Pat1, Upf1, and  
81 Edc3 also interact with specific binding motifs in the large C-terminal domain of Dcp2 (He and  
82 Jacobson, 2015a, Harigaya et al., 2010). These interaction data and additional observations  
83 led us to propose a new model for regulation of mRNA decapping (He and Jacobson, 2015a)  
84 in which different decapping activators form distinct decapping complexes *in vivo*, each of  
85 which has a unique substrate specificity that targets a subset of yeast mRNAs. To test  
86 aspects of this model, and to further understand the roles of Pat1, Dhh1, and the Lsm1-7  
87 complex in general mRNA decapping we have analyzed the effects of deletions of the *PAT1*,

88 *LSM1*, or *DHH1* genes and the large Dcp2 C-terminal domain on transcriptome-wide mRNA  
89 accumulation. Our results reveal a critical role for the Dcp2 C-terminal domain in regulating  
90 mRNA decapping, demonstrate that Pat1, Lsm1, and Dhh1 control the decapping of specific  
91 subsets of yeast mRNAs, and uncover substantial indirect consequences of mutations in  
92 genes encoding components of the decapping apparatus.

93

94

## 95 **RESULTS**

### 96 **Elimination of the large Dcp2 C-terminal domain causes significant changes in** 97 **genome-wide mRNA expression**

98 We previously identified multiple regulatory elements in the large C-terminal domain of  
99 Dcp2, including one negative element that inhibits *in vivo* decapping activity and a set of  
100 positive elements that promote both substrate specificity and decapping activation. The latter  
101 appear to operate by binding to specific decapping activators such as Upf1, Edc3, and Pat1  
102 (He and Jacobson, 2015a). To extend our previous study and to further assess the roles of  
103 these Dcp2 regulatory elements in *in vivo* decapping control, we analyzed the effect of C-  
104 terminal truncation of Dcp2 on transcriptome-wide mRNA accumulation. RNA-Seq was used  
105 to analyze transcript populations in wild-type yeast cells and in cells harboring the previously  
106 characterized *dcp2-N245* allele (He and Jacobson, 2015a). This allele produces a Dcp2  
107 decapping enzyme that contains only the first 245 amino acids of the protein, and appears to  
108 have constitutively activated and indiscriminate decapping activity, at least with respect to the  
109 limited number of mRNAs analyzed previously (He and Jacobson, 2015a). As with any  
110 mutation, truncation of Dcp2 could have a direct effect on mRNA decapping, or it could have  
111 an indirect effect on overall gene expression. To identify those transcripts directly affected by  
112 C-terminal truncation of Dcp2, we constructed two additional isogenic strains with severely  
113 compromised decapping activity and included these two strains in our RNA-Seq experiments.  
114 These strains, dubbed *dcp2-E153Q-N245* and *dcp2-E198Q-N245*, harbor the same *dcp2-*  
115 *N245* allele but each also contains one additional function-inactivating mutation in an active  
116 site residue of the Dcp2 Nudix domain, i.e., glutamate (E) to glutamine (Q) substitutions at  
117 codon positions 153 and 198, respectively. E153 of Dcp2 has been shown to function as a

118 general base during the hydrolysis reaction and E198 is involved in Mg<sup>2+</sup> coordination within  
119 the Nudix domain (Aglietti et al., 2013). *E153Q* and *E198Q* mutations essentially eliminate  
120 the decapping activity of Dcp2 both *in vitro* and *in vivo* (Aglietti et al., 2013, He and Jacobson,  
121 2015a).

122 RNA-Seq libraries prepared from wild-type cells and from the isogenic strains  
123 harboring the *dcp2-N245*, *dcp2-E153Q-N245*, or *dcp2-E198Q-N245* alleles showed good  
124 read count distribution (Figure 1A) and notable consistency between biological replicates,  
125 with Pearson correlation coefficients ranging from 0.96 to 0.99 (Figure 1-figure supplement  
126 1). Utilizing previously described data analysis pipelines for transcript quantitation and  
127 assessment of differential expression (Celik et al., 2017), we identified the transcripts that  
128 were differentially expressed in each of the mutant strains relative to the wild-type strain. The  
129 decapping-deficient *dcp2-E153Q-N245* and *dcp2-E198Q-N245* strains exhibited significant  
130 numbers of transcripts that were differentially expressed. We identified 1921 up-regulated  
131 and 1845 down-regulated transcripts in the *dcp2-E153Q-N245* strain, and 1346 up-regulated  
132 and 1428 down-regulated transcripts in the *dcp2-E198Q-N245* strain (Figures 1B, C, D).  
133 Given the general requirement for the decapping enzyme in yeast mRNA decay (Parker,  
134 2012), the detection of a large number of up-regulated transcripts in these two strains was  
135 not surprising, i.e., the up-regulated transcripts are most likely *bona fide* substrates of the  
136 yeast decapping enzyme. In support of this interpretation, the up-regulated transcript lists  
137 from these strains contain all our previously characterized individual decapping substrates  
138 and also exhibited highly significant overlap with the up-regulated transcript lists from *dcp1Δ*,  
139 *dcp2Δ*, *xrn1Δ*, and *upf1/2/3Δ* cells (Figure 1-figure supplement 2). In contrast, the finding that  
140 a large number of transcripts was also down-regulated in the two decapping-inactive strains

141 was surprising. Similar observations were also made in our recent RNA-Seq analyses of  
142 *dcp1* $\Delta$  and *dcp2* $\Delta$  cells (Celik et al., 2017). These results indicate that general inhibition of  
143 mRNA decapping may also have severe secondary effects on transcriptome-wide mRNA  
144 accumulation.

145 Examination of the up- and down-regulated transcript lists from the two catalytically  
146 inactive strains revealed a significant overlap, but also a notable difference (Figures 1B, C).  
147 The two strains share 1186 up-regulated and 1362 down-regulated transcripts. However, the  
148 *dcp2-E153Q-N245* strain yielded 575 more up-regulated and 417 more down-regulated  
149 transcripts than the *dcp2E198Q-N245* strain. To explore whether there was a significant  
150 difference in the expression patterns between these two strains, we applied the same  
151 differential expression pipeline but compared the *dcp2E153Q-N245* and *dcp2E198Q-N245*  
152 libraries directly. This analysis revealed only 21 differentially expressed transcripts between  
153 these two strains (Figure 1E, leftmost panel). From this result, we conclude that there is no  
154 fundamental difference in expression patterns between the two strains. However, because  
155 the two strains harbor different *dcp2* alleles, the encoded decapping enzymes may have  
156 slightly different albeit significantly reduced activities. Thus, some subtle differences in levels  
157 of expression may actually exist for a large number of transcripts between the two strains, as  
158 we noticed in our validation experiments (see below). The subtle differences in levels of  
159 expression for these transcripts were likely captured in the *dcp2-E153Q-N245* vs *WT* but not  
160 in the *dcp2-E198Q-N245* vs *WT* comparison.

161 Elimination of the entire C-terminal domain of Dcp2 significantly altered genome-wide  
162 mRNA expression. Compared to *WT* cells, a total of 1530 transcripts were differentially  
163 expressed in *dcp2-N245* cells: 616 transcripts showed up-regulation and 914 transcripts



164 showed down-regulation (Figures 1B, C). To assess the specific effect of the C-terminal  
165 truncation of Dcp2 on mRNA decapping, we compared the expression pattern of the *dcp2-*  
166 *N245* strain to the patterns of the *dcp2-E153Q-N245* and *dcp2-E198Q-N245* strains (Figures  
167 1B, C). Transcripts differentially expressed in these three strains shared a partial overlap, but  
168 also exhibited notable differences. A significant fraction of transcripts differentially expressed  
169 in the *dcp2-N245* strain (324 out of 616 for the up-regulated, and 650 out of 914 for the down-  
170 regulated) had concordant up- or down-regulation in the catalytically inactive strains.  
171 Interestingly, the majority of transcripts differentially expressed in the catalytically inactive  
172 strains (1567 out of 1891 for the up-regulated, and 1261 out of 1911 for the down-regulated)  
173 had unchanged levels in the *dcp2-N245* strain. Furthermore, a significant fraction of  
174 transcripts differentially expressed in the *dcp2-N245* strain (292 out of 616 for the up-regulated,  
175 and 264 out of 914 for the down-regulated) had unchanged levels in the catalytically inactive  
176 strains. Together, these results indicate that the *dcp2-N245* strain and the two catalytically  
177 inactive strains have largely different global mRNA expression patterns and suggest that the  
178 C-terminal truncation of Dcp2 does not block general mRNA decapping, but causes  
179 deregulation of decapping for specific mRNAs. To further support this conclusion, we carried  
180 direct pairwise comparisons between the *dcp2-N245* and the *dcp2E-153Q-N245* or *dcp2E-*  
181 *198Q-N245* libraries. The *dcp2-N245* strain yielded 1658 up-regulated and 1690 down-  
182 regulated transcripts compared to the *dcp2E153Q-N245* strain, and 1113 up-regulated 1090  
183 down-regulated compared to the *dcp2E198Q-N245* strain (Figure 1E, middle and right  
184 panels), further illustrating these differences.

185

186 **Elimination of the C-terminal domain of Dcp2 deregulates but does not block mRNA**  
187 **decapping**

188 Our comparison of the transcripts differentially expressed between *dcp2-N245* cells  
189 and cells expressing the two decapping-deficient alleles suggested that the *dcp2-N245*  
190 truncation causes deregulated decapping but not decapping inhibition. To explore this  
191 concept further, we examined correlations of the transcriptome-wide profiles of all transcripts  
192 in the *dcp2-N245* strain and in yeast strains severely comprised in decapping activity (*dcp2E-*  
193 *153Q-N245* or *dcp2E-198Q-N245* cells) or strains lacking decapping or 5' to 3'  
194 exoribonuclease activities (*dcp1Δ*, *dcp2Δ*, and *xrn1Δ* cells). As controls, we also did pairwise  
195 comparisons of the profiles for the latter group of strains. In this analysis, profiling data for the  
196 *dcp1Δ*, *dcp2Δ*, and *xrn1Δ* strains were from our recently published study (Celik et al., 2017).  
197 Because the *dcp1Δ*, *dcp2Δ*, and *xrn1Δ* libraries were prepared at a different time, to improve  
198 the consistency, we used the relative levels (i.e., the fold changes relative to the  
199 corresponding *WT* control) of each transcript in all these strains in our analyses. As shown in  
200 Figure 2A, the *dcp1Δ* and *dcp2Δ* strains, or the *dcp2E153Q-N245* and *dcp2E198Q-N245*  
201 strains, showed excellent correlation (Pearson correlation coefficients = 0.868 and 0.932,  
202 respectively). The *dcp1Δ* and *dcp2Δ* strains also showed good correlation with the  
203 *dcp2E153Q-N245*, *dcp2E198Q-N245* or *xrn1Δ* strains (Pearson correlation coefficients =  
204 0.812, 0.805, 0.748 for *dcp1Δ* and 0.772, 0.789, 0.734 for *dcp2Δ* strains, respectively). In  
205 contrast, the *dcp2-N245* strain exhibited only modest correlation with each of the *dcp1Δ*,  
206 *dcp2Δ*, *dcp2E153Q-N245*, *dcp2E198Q-N245*, or *xrn1Δ* strains (Pearson correlation  
207 coefficients = 0.371, 0.345, 0.423, 0.421, and 0.379). These results indicate that the *dcp2-*  
208 *N245* strain has a significantly different expression profile from yeast strains severely

209 deficient in or lacking decapping or 5' to 3' exoribonuclease activities, further arguing that the  
210 C-terminal truncation of Dcp2 deregulates but does not block mRNA decapping.

211 To validate our RNA-Seq results and to assess the potential mechanisms of  
212 decapping deregulation caused by elimination of the Dcp2 C-terminal domain, we focused on  
213 a group of 264 transcripts that were down-regulated uniquely in *dcp2-N245* cells (Figure 1C).  
214 Because the levels of transcripts from this group were not altered in *dcp2-E153Q-N245* or  
215 *dcp2-E198Q-N245* cells, we reasoned that their decreased accumulation in *dcp2-N245* cells  
216 was likely to be caused by accelerated or indiscriminate decapping by a constitutively  
217 activated Dcp2 decapping enzyme which had lost its negative regulation. To test this  
218 hypothesis, we examined whether elimination of *XRN1*, a gene encoding the 5' to 3'  
219 exoribonuclease that functions downstream of decapping, can restore the levels of the down-  
220 regulated transcripts in *dcp2-N245* cells. To assess the specificity of *XRN1* deletion, we also  
221 analyzed the effects of elimination of *SKI2* or *SKI7* on the accumulation of the down-  
222 regulated transcripts in *dcp2-N245* cells. *SKI2* encodes a 3' to 5' RNA helicase, *SKI7*  
223 encodes a GTPase, and both gene products are required for exosome-mediated 3' to 5'  
224 mRNA decay (Parker, 2012). We constructed a set of yeast double mutant strains harboring  
225 the *dcp2-N245* allele and deletions of the *XRN1*, *SKI2*, or *SKI7* genes. As additional controls,  
226 we also constructed yeast double mutants harboring the *dcp2-E153Q-N245* or *dcp2-E198Q-*  
227 *N245* alleles and a deletion of *XRN1*. We selected eleven representative transcripts from the  
228 down-regulated group and employed northern blotting to analyze the decay phenotypes of  
229 these transcripts in the respective single and double mutant strains. Among the eleven  
230 selected transcripts, nine (*GDH1*, *ARL1*, *DAL3*, *YGL117W*, *RPS9A*, *SUC2*, *CPA1*, *HIS4*, and  
231 *SER3*) are typical decapping substrates and two (*HCA1* pre-mRNA and *HSP82* mRNA) are

232 atypical decapping substrates, i.e., the latter are normally subject to degradation by other  
233 decay pathways. As shown in Figure 2B, all eleven transcripts manifested decreased levels  
234 in *dcp2-N245* cells compared to wild-type cells. Deletion of *XRN1* completely restored the  
235 mRNA levels in *dcp2-N245* cells for almost all transcripts. In contrast, elimination of *SKI2* or  
236 *SKI7* had no effect on mRNA levels for each of the eleven transcripts in *dcp2-N245* cells.  
237 These results validate our RNA-Seq analyses and demonstrate that decreased accumulation  
238 of these representative transcripts in *dcp2-N245* cells is indeed caused by accelerated or  
239 opportunistic decapping of the mRNAs. This experiment provides direct experimental  
240 evidence that Dcp2 is subject to negative regulation through its C-terminal domain and that  
241 loss of this negative regulation causes indiscriminate mRNA decapping.

242

### 243 **Decapping activators Pat1, Lsm1, and Dhh1 target specific subsets of yeast** 244 **transcripts with overlapping substrate specificity**

245 To assess the roles of the general decapping activators Pat1, Lsm1, and Dhh1 in  
246 mRNA decay, we generated yeast strains harboring single deletions of the *PAT1*, *LSM1*, or  
247 *DHH1* genes and analyzed the expression profiles of the resulting *pat1* $\Delta$ , *lsm1* $\Delta$ , and *dhh1* $\Delta$   
248 strains by RNA-Seq. The RNA-Seq libraries from these strains showed good read count  
249 distribution (Figure 3A) and notable consistency between biological replicates (Figure 3-figure  
250 supplement 1). Using the same analysis pipeline described above, we identified 940 up-  
251 regulated and 685 down-regulated transcripts in *pat1* $\Delta$  cells, 955 up-regulated and 681 down-  
252 regulated transcripts in *lsm1* $\Delta$  cells, and 1098 up-regulated and 788 down-regulated  
253 transcripts in *dhh1* $\Delta$  cells (Figures 3B-D). Because the functions of Pat1, Lsm1, and Dhh1 are  
254 required for general mRNA decapping (Coller and Parker, 2005, Fischer and Weis, 2002,

255 Coller et al., 2001, Tharun et al., 2000, Bouveret et al., 2000), detection of a large number of  
256 up-regulated transcripts in *pat1* $\Delta$ , *lsm1* $\Delta$ , and *dhh1* $\Delta$  cells was expected. The up-regulated  
257 transcripts are likely the *bona fide* substrates of these decapping activators, but detection of  
258 comparable numbers of down-regulated transcripts in each of these strains was largely  
259 unexpected. Much like our observations of the strains with catalytically-deficient Dcp2,  
260 deletion of the *PAT1*, *LSM1*, or *DHH1* genes may have secondary effects on genome-wide  
261 mRNA expression.

262 To explore the functional relationships of Pat1, Lsm1, and Dhh1 in mRNA decay, we  
263 compared the up- and down-regulated transcript lists from the *pat1* $\Delta$ , *lsm1* $\Delta$ , and *dhh1* $\Delta$   
264 strains. As shown in Figures 3B and C, transcripts differentially expressed in the *pat1* $\Delta$  and  
265 *lsm1* $\Delta$  strains exhibited highly significant overlap. About 84% of the up-regulated transcripts  
266 (864 out of 1031) and 77% of the down-regulated transcripts (583 out of 756) were shared by  
267 these two strains. Transcripts differentially expressed in the *dhh1* $\Delta$  strain exhibited partial  
268 overlap with those in the *pat1* $\Delta$  and *lsm1* $\Delta$  strains. About 50% of the up-regulated transcripts  
269 (542 out of 1098) and 43% of the down-regulated transcripts (342 out of 788) in the *dhh1* $\Delta$   
270 strain were shared by the *pat1* $\Delta$  or *lsm1* $\Delta$  strains. In addition, 482 transcripts were commonly  
271 up-regulated and 290 commonly down-regulated in all three strains. Given the substantial  
272 overlap of differentially expressed transcripts in the *pat1* $\Delta$  and *lsm1* $\Delta$  strains, and the physical  
273 interactions between Pat1 and the Lsm1-7 complex (Wu et al., 2014, Bouveret et al., 2000),  
274 we tested whether Pat1 and Lsm1 controlled the expression of the same set of transcripts.  
275 Utilizing the same differential expression analysis pipeline, we compared the *pat1* $\Delta$  and *lsm1* $\Delta$   
276 libraries directly. The *pat1* $\Delta$  and *lsm1* $\Delta$  strains manifested remarkable consistency in their  
277 expression profiles over the entire transcriptome, with only four transcripts differentially

278 expressed between the two strains, two of which were caused by the respective gene  
279 deletions (Figure 1E, leftmost panel, red dots). Direct comparisons were also applied to the  
280 *dhh1* $\Delta$  and *pat1* $\Delta$  or *lsm1* $\Delta$  libraries. This analysis revealed significant differences in the  
281 expression profiles between the *dhh1* $\Delta$  and *pat1* $\Delta$  or *lsm1* $\Delta$  strains (Figure 3E, last two  
282 panels). The *dhh1* $\Delta$  strain yielded 1332 up-regulated and 874 down-regulated transcripts  
283 compared to the *pat1* $\Delta$  strain, and 1385 up-regulated and 1037 down-regulated transcripts  
284 compared to the *lsm1* $\Delta$  strain.

285 Together, these results indicate that Pat1, Lsm1, and Dhh1 target specific subsets of  
286 yeast transcripts with overlapping substrate specificity. Pat1 and Lsm1 appear to function  
287 together and target the same set of transcripts in yeast cells. Dhh1 appears to have distinct  
288 functions from Pat1 and Lsm1 and targets a set of transcripts that only partially overlaps with  
289 those regulated by Pat1 and Lsm1.

290

### 291 **Identification of transcripts uniquely and commonly targeted by Pat1, Lsm1, and Dhh1**

292 Based on the well established *in vivo* functions and *in vitro* activities of Pat1, Lsm1,  
293 and Dhh1 (Nissan et al., 2010, Coller and Parker, 2005, Fischer and Weis, 2002, Coller et al.,  
294 2001, Tharun et al., 2000, Bouveret et al., 2000), we considered the up-regulated transcripts  
295 in the *pat1* $\Delta$ , *lsm1* $\Delta$  and *dhh1* $\Delta$  strains to be direct substrates of these decapping activators  
296 for the most part, and the respective down-regulated transcripts in these strains to arise  
297 indirectly as a consequence of general defects in mRNA decapping (see above). To evaluate  
298 the reliability of these propositions, we examined the expression patterns of these up- and  
299 down-regulated transcripts in *dcp1* $\Delta$ , *dcp2* $\Delta$ , and *xrn1* $\Delta$  cells as well as in *dcp2-N245*, *dcp2E-*  
300 *153Q-N245*, and *dcp2E-198Q-N245* cells. Further, to gain insight into the overlapping vs.

301 distinct regulatory activities of Pat1, Lsm1, and Dhh1, we divided the differentially expressed  
302 transcripts from *pat1* $\Delta$ , *lsm1* $\Delta$ , and *dhh1* $\Delta$  cells into six distinct subgroups based on their  
303 decay phenotypes and examined the distribution of the relative levels of transcripts from  
304 these subgroups in each of the mutant strains. The up-regulated transcripts were divided into  
305 three non-overlapping subgroups: Up-o-d, up-regulated only in the *dhh1* $\Delta$  strain (556  
306 transcripts); Up-o-pl, up-regulated only in the *pat1* $\Delta$  and *lsm1* $\Delta$  strains (382 transcripts); and  
307 Up-a-pld, up-regulated in all three deletion strains (482 transcripts) (Figure 3B). Similarly, the  
308 down-regulated transcripts were also divided into three non-overlapping subgroups: Down-o-  
309 d, down-regulated only in the *dhh1* $\Delta$  strain (446 transcripts); Down-o-pl, down-regulated only  
310 in the *pat1* $\Delta$  and *lsm1* $\Delta$  strains (293 transcripts); and Down-a-pld, down-regulated in all three  
311 deletion strains (290 transcripts) (Figure 3C).

312 Transcripts from the six subgroups had distinct expression patterns in *dcp1* $\Delta$ , *dcp2* $\Delta$ ,  
313 *xrn1* $\Delta$ , *dcp2-N245*, *dcp2-E-153Q-N245*, and *dcp2-E-198Q-N245* cells (Figures 4A-F).  
314 Transcripts from two of the up-regulated subgroups, Up-o-d and Up-a-pld, exhibited similar  
315 expression patterns and had significantly increased levels of expression (relative to the WT  
316 strain) in all six mutant strains. Transcripts from the third up-regulated subgroup, Up-o-pl,  
317 exhibited a slightly different expression pattern and had significantly increased levels in  
318 *dcp1* $\Delta$ , *dcp2* $\Delta$ , *dcp2E-153Q-N245*, and *dcp2E-198Q-N245* cells, marginally increased levels  
319 in *xrn1* $\Delta$  cells, but unaltered levels in *dcp2-N245* cells. These results show that transcripts  
320 from the three up-regulated subgroups are all sensitive to the loss of decapping activity,  
321 indicating that they are *bona fide* substrates of the decapping enzyme and the general 5' to 3'  
322 decay pathway. The marginal effect of *XRN1* deletion on the expression of the transcripts  
323 from the Up-o-pl subgroup may suggest that, once decapped, a significant fraction of

324 transcripts from this subgroup can also be efficiently degraded by the 3' to 5' decay pathway.  
325 Transcripts from the three down-regulated subgroups exhibited two different expression  
326 patterns. Transcripts from the Down-o-d and Down-a-pld subgroups had significantly  
327 decreased levels in all six mutant strains. This result shows that transcripts from these two  
328 subgroups are sensitive to both partial and complete loss of decapping activity as well as to  
329 complete loss of the 5' to 3' exoribonuclease activity. The concordant down-regulation  
330 observed for these transcripts in all our mRNA decay mutant strains strongly argues that they  
331 are indirectly controlled by the general 5' to 3' decay activities. Transcripts from the down-  
332 regulated Down-o-pl subgroup had significantly decreased levels in *dcp1Δ*, *dcp2Δ*, *dcp2E-*  
333 *153Q-N245*, and *dcp2E-198Q-N245* cells but increased levels in *xrn1Δ* and *dcp2-N245* cells.  
334 The increased expression of these transcripts in response to deletion of *XRN1* and C-  
335 terminal truncation of Dcp2 suggests that they are also *bona fide* substrates of the decapping  
336 enzyme and thus are likely controlled by Pat1 and Lsm1 directly. The decreased levels of  
337 these transcripts in *dcp1Δ*, *dcp2Δ*, *dcp2E-153Q-N245*, and *dcp2E-198Q-N245* cells suggests  
338 that when decapping is completely blocked, these transcripts may be more efficiently  
339 degraded by the 3' to 5' decay pathway.

340 Collectively, these results indicate that transcripts from all three up-regulated  
341 subgroups and one of the down-regulated subgroups (Down-o-pl) are substrates of the  
342 decapping enzyme and thus are likely to be direct targets of Pat1, Lsm1, and Dhh1. In  
343 contrast, transcripts from the other two down-regulated subgroups (Down-o-d and Down-a-  
344 pld) appear to be controlled indirectly by the general 5' to 3' decay activities and thus are not  
345 the direct targets of Pat1, Lsm1, and Dhh1. To obtain further support for this conclusion, we  
346 analyzed the pattern of the codon protection index for transcripts in each of these six



347 subgroups. This index is a measure of the degree of a transcript's co-translational 5' to 3'  
348 decay and is defined as the ratio of sequencing reads in the ribosome protected frame over  
349 the average reads of the non-protected frames of the 5' to 3' decay intermediates from a  
350 specific transcript (Pelechano et al., 2015). Values greater than 1 are indicators of co-  
351 translational 5' to 3' decay. As shown in Figure 4G, transcripts from the Up-o-d, Up-o-pl, Up-  
352 a-pld, and Down-o-pl subgroups all had median codon protection index values greater than 1.  
353 In contrast, transcripts from the Down-o-d and Down-a-pld subgroups both had median  
354 codon protection index values less than 1. These data strengthen our conclusion on the  
355 separation of differentially expressed transcripts into direct target and non-target categories.  
356 Based on their expression patterns, we suggest that transcripts from the Up-o-d subgroup are  
357 targeted by Dhh1, transcripts from the Up-o-pl and Down-o-pl subgroups are targeted by  
358 Pat1 and Lsm1, and transcripts from the Up-a-pld subgroup are targeted by all three factors.

359

### 360 **Validation of transcripts controlled directly or indirectly by Pat1, Lsm1, and Dhh1**

361 To validate the results from our RNA-Seq analyses and to assess the proposed decay  
362 mechanisms for transcripts in different subgroups controlled by Pat1, Lsm1, and Dhh1, we  
363 selected 34 transcripts (representing mRNAs from each subgroup) and analyzed both their  
364 levels and patterns of expression by northern blotting. In this experiment, we analyzed mRNA  
365 levels in wild-type, *pat1* $\Delta$ , *lsm1* $\Delta$ , and *dhh1* $\Delta$  strains, but also included *dcp1* $\Delta$ , *dcp2* $\Delta$ , *xrn1* $\Delta$ ,  
366 *dcp2-N245*, *dcp2E-153Q-N245*, and *dcp2E-198Q-N245* strains to assess each transcript's  
367 sensitivity to 5' to 3' decay, and *upf1* $\Delta$ , *edc3* $\Delta$ , *scd6* $\Delta$ , *ski2* $\Delta$ , *ski7* $\Delta$ , and *ski2* $\Delta$ *ski7* $\Delta$  strains to  
368 serve as negative controls. Our northern analyses confirmed the expression patterns for 30  
369 out of 34 selected transcripts. As shown in Figure 5, four transcripts (*CIT2*, *SDS23*, *HOS2*,

370 and *PYK2*) from the Up-o-d subgroup all had increased levels only in *dhh1* $\Delta$  cells but not in  
371 *pat1* $\Delta$  and *lsm1* $\Delta$  cells; four transcripts (*DIF1*, *AGA1*, *BUR6*, and *LSM3*) from the Up-o-pl  
372 subgroup all had increased levels only in *pat1* $\Delta$  and *lsm1* $\Delta$  cells but not in *dhh1* $\Delta$  cells; ten  
373 transcripts (*HXT6*, *GPH1*, *HXK1*, *CHA1*, *RTC3*, *NQM1*, *PGM2*, *TMA10*, *GAD1*, and *SPG4*)  
374 from the Up-a-pld subgroup all had increased levels in *pat1* $\Delta$ , *lsm1* $\Delta$ , and *dhh1* $\Delta$  cells; and  
375 two transcripts (*MUP3* and *GTT2*) from the Down-o-pl subgroup both had decreased levels in  
376 *pat1* $\Delta$  and *lsm1* $\Delta$  cells, but not in *dhh1* $\Delta$  cells. Importantly, the twenty transcripts from these  
377 four subgroups all had increased levels in *dcp1* $\Delta$ , *dcp2* $\Delta$ , *dcp2E-153Q-N245*, and *dcp2E-*  
378 *198Q-N245* cells, and nineteen out twenty transcripts (except *GTT2*) also had increased  
379 levels in *xrn1* $\Delta$  cells. These results support our proposition that transcripts from these four  
380 subgroups are all *bona fide* substrates of the decapping enzyme and provide direct evidence  
381 that these transcripts are indeed degraded by the general 5' to 3' decay pathway. Also as  
382 expected, three transcripts (*RPP1A*, *TMA19*, and *GPD2*) from the Down-a-pld subgroup all  
383 had decreased levels in *pat1* $\Delta$ , *lsm1* $\Delta$ , and *dhh1* $\Delta$  cells. Consistent with the idea that these  
384 transcripts were affected indirectly as a consequence of a general defect in decapping, all  
385 three transcripts also had decreased levels in *dcp1* $\Delta$ , *dcp2* $\Delta$ , *dcp2E-153Q-N245*, and  
386 *dcp2E-198Q-N245* cells. Interestingly, these three transcripts only had slightly increased  
387 levels in *xrn1* $\Delta$  cells, suggesting they are mostly degraded by the 3' to 5' decay pathway. Five  
388 transcripts (*YIL164C*, *THI22*, *EST1*, *TRP1-1*, and *ALR2*) from the Down-o-d subgroup had  
389 decreased levels only in *dhh1* $\Delta$  cells but not in *pat1* $\Delta$  and *lsm1* $\Delta$  cells (Figure 7D).

390 The four transcripts that could not be confirmed deviated from expectations for  
391 different reasons: one had an extremely low expression level and could not be effectively  
392 verified (*SFG1*), one had complex isoforms that are not annotated in the genome releases

393 (*FRE3*), and therefore not used in our statistical procedures, and the other two (*ASC1* pre-  
394 mRNA and mRNA) were most likely bioinformatics false positives due to multiple alignment  
395 artifacts of sequence reads to the spliced and unspliced isoforms from the same locus.

396

### 397 **Transcripts targeted by Pat1, Lsm1, and Dhh1 are all translated inefficiently**

398         Given the intimate linkage of mRNA translation and decay (Mishima and Tomari, 2016,  
399 Presnyak et al., 2015, Roy and Jacobson, 2013), and to gain insight into the roles of Pat1,  
400 Lsm1, and Dhh1 in decapping regulation, we sought to identify any unique properties  
401 associated with the translation of transcripts controlled by these three factors. To this end, we  
402 analyzed the pattern and distribution of the average codon optimality score, the average  
403 ribosome density, and the estimated protein abundance for transcripts from the six subgroups  
404 of differentially expressed mRNAs in *pat1* $\Delta$ , *lsm1* $\Delta$ , and *dhh1* $\Delta$  cells. In this analysis, the  
405 average codon optimality score of individual transcripts was based on the scores defined by  
406 Pechmann and Frydman (Pechmann and Frydman, 2013) and these scores are in fact the  
407 normalized tRNA adaptation index in which mRNA abundances are used to correct for the  
408 number of codons vs. number of tRNA genes. Ribosomal densities were derived from  
409 published ribosome profiling and RNA-Seq data from wild-type yeast cells grown under  
410 standard conditions (Young et al., 2015). Protein abundance levels were obtained from the  
411 curated PaxDb (Protein Abundances Across Organisms) database (Wang et al., 2012) and  
412 comprise the scaled aggregated estimates over several proteomic data sets.

413         As shown in Figures. 6A-C, transcripts from the three up-regulated Up-o-d, Up-o-pl,  
414 and Up-a-pld subgroups exhibited similar and consistent data patterns: they all had relatively  
415 low average codon optimality scores, high ribosome densities, and low protein levels. These

416 observations indicate that transcripts from these three subgroups are all translated  
417 inefficiently, most likely because of less efficient translation elongation. Transcripts from the  
418 three down-regulated subgroups exhibited two different data patterns. Transcripts from the  
419 Down-o-d and Down-a-pld subgroups exhibited one consistent data pattern: they all had  
420 relatively high average codon optimality scores, low ribosome densities, and high protein  
421 levels. These observations suggest that transcripts from these two subgroups are translated  
422 efficiently, a characteristic probably reflecting highly efficient translation elongation.  
423 Transcripts from the Down-o-pl subgroup had a distinct data pattern: they had relatively low  
424 average codon optimality scores, low ribosome densities, and but relatively high protein  
425 levels. These observations suggest that transcripts from this subgroup may be inefficiently  
426 translated, but have relative long mRNA half-lives. Together, these results indicate that  
427 transcripts targeted directly by Pat1, Lsm1, and Dhh1 are all translated less efficiently. In  
428 contrast, transcripts controlled indirectly by these three factors appear to be translated more  
429 efficiently.

430 Notably, although the Dhh1 function in mRNA decay was recently suggested to be  
431 linked to codon optimality (Radhakrishnan et al., 2016), our analyses revealed that the  
432 average codon optimality score of individual transcripts was not a reliable predictor of the  
433 Dhh1 requirement for their decay. Transcripts targeted by Dhh1 (from the Up-o-d and Up-a-  
434 pld subgroups) had a low but broad range of average codon optimality scores (Figure 6A).  
435 Interestingly, in that range, there were also thousands of transcripts that were not targeted by  
436 Dhh1, including transcripts uniquely targeted by Pat1 and Lsm1 (from the Up-o-pl and Down-  
437 o-pl subgroups), as well as transcripts targeted by none of these three factors. This raises the  
438 possibility that additional decay factors may be responsible for targeting these transcripts.

439

440 **Pat1, Lsm1, and Dhh1 have non-overlapping functions with NMD factors in mRNA**  
441 **decapping regulation**

442 To further define the roles of Pat1, Lsm1, and Dhh1 in mRNA decapping regulation,  
443 we examined the functional relationships between these three factors and the NMD factors  
444 Upf1, Upf2, and Upf3. We compared the transcripts targeted by Pat1, Lsm1, and Dhh1 to  
445 those targeted by the three Ups (Celik et al., 2017). As shown in Figure 7A, transcripts from  
446 the Up-o-d, Up-o-pl, and Up-a-pld subgroups all had only minimal and insignificant overlap  
447 with NMD substrates. In addition, as revealed by a two-dimensional hierarchical clustering  
448 analysis of differentially expressed transcripts, *pat1* $\Delta$ , *lsm1* $\Delta$ , and *dhh1* $\Delta$  cells also had  
449 profiles distinct from those of *upf1* $\Delta$ , *upf2* $\Delta$ , and *upf3* $\Delta$  cells (Figure 7B). These results  
450 indicate that the general decapping activators Pat1, Lsm1, and Dhh1 have roles that are  
451 distinct from and non-overlapping with those of the NMD factors in mRNA decapping  
452 regulation.

453

454 **Deletion of *DHH1* promotes the degradation of a fraction of NMD substrates**

455 We recently demonstrated that yeast decapping activators form distinct complexes  
456 with the decapping enzyme *in vivo* (He and Jacobson, 2015a), suggesting that different  
457 decapping activators may compete with each other for binding to the decapping enzyme. One  
458 implication of this notion is that in addition to providing targeting specificity for the decapping  
459 enzyme, decapping activators can also control each other's activities indirectly by limiting or  
460 promoting the free pool of available decapping enzyme. A testable prediction of this dynamic  
461 mRNA decapping regulation is that, in addition to stabilizing its targeted transcripts, deletion

462 of a specific activator may also promote the degradation of substrates of the alternative  
463 mRNA decay pathways. To test this hypothesis, we examined whether the down-regulated  
464 subgroups from the differentially expressed transcripts in *pat1* $\Delta$ , *lsm1* $\Delta$ , and *dhh1* $\Delta$  cells may  
465 contain NMD substrates. This analysis revealed that the three subgroups exhibited  
466 significantly different enrichment patterns for NMD substrates (Figure 7C). The Down-o-d  
467 subgroup (transcripts down-regulated only in *dhh1* $\Delta$  cells) was enriched for NMD substrates  
468 (Fisher's exact test,  $p=7.3 \times 10^{-15}$ ). In contrast, the Down-o-pl (transcripts down-regulated  
469 only in *pat1* $\Delta$  and *lsm1* $\Delta$  cells) was depleted of NMD substrates (Fisher's exact test,  $p=6.2$   
470  $\times 10^{-6}$ ). Finally, the Down-a-pld subgroup (transcripts down-regulated in all three deletion  
471 strains) showed neither enrichment for nor depletion of NMD substrates (Fisher's exact test  
472  $p=0.12$ ). These results provide additional evidence that transcripts from the Down-o-pl  
473 subgroup are direct targets of Pat1 and Lsm1, and show that the Down-o-d subgroup  
474 contains a fraction of NMD-targeted transcripts. To validate the latter observation, we  
475 selected five representative NMD substrates that were also down-regulated in *dhh1* $\Delta$  cells  
476 and analyzed their expression levels and patterns in a set of yeast strains described above.  
477 As expected, northern analyses showed that all five transcripts (*YIL164C*, *THI22*, *EST1*,  
478 *TRP1-1*, and *ALR2*) had decreased levels in *dhh1* $\Delta$  cells but increased levels in *upf1* $\Delta$ ,  
479 *dcp1* $\Delta$ , *dcp2* $\Delta$ , and *xrn1* $\Delta$  cells (Figure 7D, left panel). The decreased accumulation for these  
480 five transcripts in *dhh1* $\Delta$  cells largely resulted from degradation by NMD as elimination of  
481 *UPF1* from *dhh1* $\Delta$  cells caused substantial increases (ranging from 4.0- to 21.6-fold) in the  
482 expression levels of each of these five transcripts (Figure 7D, right panel). Interestingly, we  
483 also observed that *dhh1* $\Delta$  *upf1* $\Delta$  cells consistently accumulated lower levels (ranging from  
484 28% to 81%) than *upf1* $\Delta$  cells for each of these five transcripts (Figure 7D, right panel),

485 suggesting that deletion of *DHH1* can also promote NMD-independent degradation of these  
486 transcripts. Together, these results indicate that deletion of *DHH1* can promote the  
487 degradation of a subset of NMD substrates by both NMD-dependent and NMD-independent  
488 mechanisms, thus arguing that decapping activators can indeed exert indirect control of each  
489 other's activities in mRNA decapping.

490

491

## 492 **DISCUSSION**

### 493 **Dcp2 C-terminal domain imparts critical *in vivo* regulatory activities in mRNA** 494 **decapping**

495 The yeast Dcp2 decapping enzyme subunit has a modular structure encompassing a  
496 conserved 245-amino acid N-terminal Nudix catalytic domain and a 725-amino acid C-  
497 terminal extension. While the catalytic function of the N-terminal domain in cap removal is  
498 well established (Floor et al., 2010, She et al., 2008, Deshmukh et al., 2008, She et al.,  
499 2006), the decapping role of the large Dcp2 C-terminal domain remains to be clarified. Here,  
500 we provide genetic evidence that the Dcp2 C-terminal domain imparts important regulatory  
501 activities to the decapping enzyme, thus playing a critical role in regulating mRNA decapping  
502 *in vivo*. Elimination of the C-terminal domain altered the expression of more than a quarter of  
503 yeast's protein-coding genes and led to both up- and down-regulation of specific transcripts  
504 (Figures. 1B, C). A key observation supporting a predominantly regulatory role for the C-  
505 terminal domain is that transcripts differentially expressed in cells lacking the Dcp2 C-terminal  
506 domain only exhibited limited correlation with those differentially expressed in cells whose  
507 decapping activity was either severely comprised or essentially absent (Figure 2A).

508 Our recent experiments revealed that the Dcp2 C-terminal domain harbors both  
509 negative and positive regulatory elements (He and Jacobson, 2015a), leading us to propose  
510 that the decapping enzyme is subject to both negative and positive regulation. Recent  
511 biochemical data also supports this model (Paquette et al., 2018). Our expression profiling of  
512 yeast cells lacking the Dcp2 C-terminal domain provides direct experimental evidence for  
513 both aspects of this hypothesis. Negative regulation of the decapping enzyme is supported by  
514 the observations that deletion of the Dcp2 C-terminal domain led to decreases in the



515 abundance of hundreds of specific transcripts, and that this down-regulation was dependent  
516 on maintenance of Dcp2's catalytic activity (Figures 1C and 2B). Importantly, the vast  
517 majority of these down-regulated transcripts were not normal decapping substrates (Figure 1-  
518 figure supplement 3). These results indicate that deletion of the Dcp2 C-terminal domain  
519 eliminates an inhibitory function of the domain and leads to uncontrolled and accelerated  
520 mRNA decapping by a constitutively activated and opportunistic Dcp2. Evidence for positive  
521 regulation of the decapping enzyme is provided by the observation that elimination of the  
522 Dcp2 C-terminal domain also caused up-regulation of hundreds of specific transcripts. As this  
523 group of transcripts also exhibited concordant up-regulation in decapping-deficient cells  
524 (Figure 1B), it is likely that the observed up-regulation originates from a deficiency in mRNA  
525 decapping caused by loss of a positive regulatory function. Collectively, these observations  
526 indicate that the C-terminal domain of Dcp2 encodes important regulatory activities and that  
527 loss of these regulatory activities can have direct consequences on decapping of hundreds of  
528 specific mRNAs.

529 Over the past decade mechanistic investigations of mRNA decapping regulation have  
530 largely been focused on the 245-amino acid N-terminal domain of Dcp2, with essentially all  
531 biochemical and structural studies using this C-terminally truncated fragment (Mugridge et al.,  
532 2016, Borja et al., 2011, Floor et al., 2010, She et al., 2008, Deshmukh et al., 2008, She et  
533 al., 2006, Wurm et al., 2017, Wurm et al., 2016, Charenton et al., 2016). This Dcp2 fragment  
534 binds to Dcp1, but lacks the binding sites for most decapping activators, including Pat1,  
535 Edc3, and Upf1 (He and Jacobson, 2015). Our genetic experiments here reveal that this N-  
536 terminal fragment of Dcp2 encodes a constitutively active decapping enzyme *in vivo* that can  
537 target a variety of mRNAs including those that normally use or do not use decapping-

538 dependent mechanisms in their degradation (Figures 1B-C). Accordingly, current models of  
539 mRNA decapping regulation based on the Dcp2 N-terminal domain may be informative with  
540 respect to the catalytic step of decapping, but most likely do not reflect complex aspects of  
541 mRNA decapping regulation *in vivo* such as substrate selection and decapping enzyme  
542 activation.

543

544 **Pat1, Lsm1, and Dhh1 target subsets of yeast transcripts with overlapping substrate**  
545 **specificity**

546 Pat1, Lsm1, and Dhh1 have long been considered as general mRNA decapping  
547 activators and their functions are usually thought to be required for decapping of most wild-  
548 type mRNAs (Parker, 2012, Collier and Parker, 2004, Fischer and Weis, 2002, Collier et al.,  
549 2001, Bouveret et al., 2000, Tharun and Parker, 1999). Contrary to this expectation, our  
550 expression profiling experiments revealed that Pat1, Lsm1, and Dhh1 are only required for  
551 decapping of a subset of transcripts in yeast cells and suggested that these factors have  
552 highly specific functions in controlling mRNA decapping (Figure 3B). Consistent with strong *in*  
553 *vivo* physical interaction and shared *in vitro* RNA binding properties (Wu et al., 2014, Sharif  
554 and Conti, 2013, Bouveret et al., 2000, Chowdhury et al., 2007), our results indicate that Pat1  
555 and Lsm1 function together (probably as a Pat1-Lsm1-7 complex) to target the same set of  
556 transcripts (Figures 3B-E). Dhh1 targets a different set of transcripts that only partially  
557 overlaps with those targeted by both Pat1 and Lsm1 (Figure 3B).

558 The partial overlap between transcripts commonly targeted by Pat1 and Lsm1 and  
559 those targeted by Dhh1 strongly indicates that these three decapping activators have distinct  
560 functions in mRNA decapping regulation and that decapping of individual mRNAs likely has

561 different functional requirements for Pat1, Lsm1, and Dhh1. For example, we identified  
562 transcripts regulated by Dhh1 but not by Pat1 and Lsm1 (the Up-o-d subgroup), transcripts  
563 regulated by Pat1 and Lsm1 but not by Dhh1 (the Up-o-pl and Down-o-pl subgroups), and  
564 transcripts regulated by all three factors (the Up-a-pld subgroup). Since the degradation of  
565 transcripts controlled by Pat1, Lsm1, and Dhh1 individually or in combination is dependent on  
566 the Dcp1-Dcp2 decapping enzyme and the Xrn1 5' to 3' exoribonuclease (Figures 4 and 5)  
567 the transcripts in these three groups are most likely *bona fide* decapping substrates.  
568 Accordingly, our observation that decapping of individual mRNAs can have different  
569 requirements for Pat1, Lsm1, and Dhh1 suggests that mRNA decapping is a multi-step  
570 process and that Pat1, Lsm1, and Dhh1 are likely to function at different steps of the  
571 decapping pathway. Given the genetic and physical interactions between Dhh1 and the Not1-  
572 Ccr4 deadenylase complex (Maillet and Collart, 2002, Hata et al., 1998, Ozgur et al., 2015,  
573 Mathys et al., 2014), and the physical interaction between Pat1 and Dcp2 (Charenton et al.,  
574 2017, He and Jacobson, 2015a), one possibility is that Dhh1 promotes deadenylation and  
575 that Pat1 and Lsm1 recruit the decapping enzyme.

576         Transcripts targeted by Pat1, Lsm1, and Dhh1 all appear to be translated inefficiently  
577 as they have relatively low average codon optimality scores, high ribosomal occupancy, and  
578 low protein production (Figure 6). These observations indicate that the functions of Pat1,  
579 Lsm1, and Dhh1 in regulating decapping are probably linked to mRNA translation, a  
580 conclusion consistent with a recent study linking Dhh1 function in mRNA decay to translation  
581 elongation through codon optimality (Radhakrishnan et al., 2016). However, our results  
582 indicate that average codon optimality scores of individual mRNAs do not correlate well with

583 a Dhh1 requirement for their decay (Figure 6). Hence, the identity and distribution of non-  
584 optimal codons in an mRNA may influence the targeting specificity by Pat1, Lsm1, and Dhh1.

585 Over past two decades models for the general functions of Pat1, Lsm1, and Dhh1 in  
586 yeast mRNA decapping were largely generated by assessing the fate of the transcripts  
587 derived from two key reporter gene constructs (Fischer and Weis, 2002, Collier et al., 2001,  
588 Hatfield et al., 1996, Decker and Parker, 1993). One reporter codes for the unstable *MFA2*  
589 mRNA and the other codes for the stable *PGK1* mRNA. Both of these transcripts are in the  
590 datasets presented here and our results show that the *MFA2* mRNA is regulated by Pat1 and  
591 Lsm1, but not by Dhh1, and that the *PGK1* mRNA is not regulated by any of the three factors.  
592 These observations highlight potential drawbacks to the use of reporter gene assays and  
593 lead to uncertainty about existing models. Most importantly, since both reporter mRNAs are  
594 not regulated by Dhh1 it becomes difficult to justify models in which Dhh1 has a direct role in  
595 decapping of these transcripts (Collier and Parker, 2005, Fischer and Weis, 2002, Collier et  
596 al., 2001).

597

## 598 **Pat1, Lsm1, and Dhh1 also have indirect roles in controlling genome-wide mRNA** 599 **expression**

600 Our expression profiling experiments revealed that, in addition to targeting specific  
601 mRNAs for decapping, Pat1, Lsm1, and Dhh1 also have indirect roles in controlling mRNA  
602 expression in yeast and that eliminating the functions of any of these three factors can have  
603 severe consequences for global mRNA accumulation. Unexpectedly, we found that deletions  
604 of *PAT1*, *LSM1*, and *DHH1* also resulted in down-regulation of hundreds of specific  
605 transcripts (Figure 3C). In contrast to the up-regulated transcripts, the vast majority of the

606 down-regulated transcripts are not direct targets of Pat1, Lsm1, or Dhh1 and their down-  
607 regulation is thus likely to result from an indirect consequence of losing the primary functions  
608 of these factors in mRNA decapping. Two subgroups of transcripts that are indirectly  
609 controlled by the activities of Pat1, Lsm1, and Dhh1 were identified. One subgroup (Down-o-  
610 d) includes transcripts that were down-regulated only in *dhh1* $\Delta$  cells and the other subgroup  
611 (Down-a-pld) includes transcripts that were down-regulated in all three deletion strains. The  
612 transcripts from these two subgroups exhibited concordant down-regulation in yeast cells  
613 partially compromised in, or completely lacking, decapping activity (Figures 4A-F).  
614 Collectively, these observations indicate that transcripts from the Down-o-d and Down-a-pld  
615 subgroups are sensitive to loss of both the regulatory and catalytic activities of mRNA  
616 decapping and argue that they are indirectly controlled by the status of general decapping  
617 activity in yeast cells.

618 Unlike the transcripts targeted directly by Pat1, Lsm1, and Dhh1, transcripts controlled  
619 indirectly by these factors are translated efficiently. Transcripts from the Down-o-d and Down-  
620 a-pld subgroups generally have higher average codon optimality scores, lower ribosomal  
621 occupancy, and higher protein production (Figure 6). These observations suggest that the  
622 susceptibility of these transcripts to the loss of Pat1, Lsm1, and Dhh1 functions is likely to be  
623 dictated by their unique properties in translation. The Down-o-d subgroup contains a small  
624 set of NMD substrates (Figure 7C) and the decreased accumulation of these NMD-regulated  
625 transcripts in *dhh1* $\Delta$  cells largely results from more efficient decapping by an NMD-dependent  
626 mechanism (Figure 7D, right panel). Because Dhh1 forms several distinct complexes with the  
627 decapping enzyme (Sharif et al., 2013, Fromm et al., 2012, Tritschler et al., 2009), more  
628 efficient decapping of NMD substrates in the absence of Dhh1 is likely caused by increases

629 in the free pool of the decapping enzyme available for NMD as a consequence of *DHH1*  
630 deletion. The majority of transcripts controlled indirectly by Pat1, Lsm1, and Dhh1 are not  
631 typical decapping substrates (Figures 4 and 5). The decreased accumulation of these  
632 transcripts in the absence of Pat1, Lsm1, and Dhh1 probably results from more efficient 3' to  
633 5' degradation. One possibility is that these transcripts are normally protected by an unknown  
634 factor at their 3'-ends. Inactivation of Pat1, Lsm1, and Dhh1 leads to the stabilization of a  
635 significant number of transcripts. The stabilized transcripts might sequester the unknown  
636 factor from their normal binding substrates and make the latter susceptible to 3' to 5' decay.  
637 An interesting implication of these observations is that deletion of the genes encoding  
638 regulators of other steps in the gene expression pathway may lead to similar indirect and  
639 opportunistic effects.

640

#### 641 **Reassessing the major functions of decapping activators**

642 Current models of mRNA decapping propose two major temporally separated  
643 functions for decapping activators, an initial repression of mRNA translation followed by  
644 stimulation of the activity of the decapping enzyme (Parker, 2012, Nissan et al., 2010, Collier  
645 and Parker, 2005). Thus, for example, Dhh1 is thought to function principally in repressing  
646 translation, Edc3 is thought to activate the decapping enzyme, and Pat1 is thought to  
647 possess both activities (Nissan et al., 2010, Collier and Parker, 2005). It is also generally  
648 believed that decapping of individual mRNAs requires the functions of multiple decapping  
649 activators (Nissan et al., 2010, Collier and Parker, 2005). Our results from *in vivo* expression  
650 profiling experiments presented here, and genetic analyses published earlier (He and  
651 Jacobson, 2015a), challenge these views with data indicating that: a) the main function of

652 decapping activators is to provide substrate specificity, i.e., to target the decapping enzyme  
653 to specific mRNAs; b) individual decapping activators target highly specific subsets of yeast  
654 transcripts and generally do not have overlapping regulatory activities (Figure 7A); and c) the  
655 decapping enzyme is subject to negative regulation and its activation is most likely coupled to  
656 substrate recognition. These principles are not dependent on translational repression, and  
657 accumulating experimental evidence indicates that prior translational repression may not be  
658 required for decapping to occur. Decapping of individual mRNAs occurs while they are still  
659 engaged in translation (Hu et al., 2010, Hu et al., 2009) and this co-translational decay  
660 appears to be widespread, both in genome-wide analyses (Pelechano et al., 2015) and in our  
661 experiments evaluating the transcripts targeted by Dhh1 (Figure 4G). Thus, decapping  
662 activators may not have primary roles in regulating mRNA translation, but instead may  
663 function by monitoring mRNA translation initiation, elongation, or termination to target unique  
664 features of individual mRNAs.

665

## 666 **Materials and Methods**

### 667 **Yeast strains**

668 All strains used in this study are in the W303 background and are listed in  
669 Supplementary Table 1. The wild-type strain (HFY114) and its isogenic derivatives harboring  
670 deletions of *UPF1* (HFY871), *DCP1* (HFY1067), or *XRN1* (HFY1080) were described  
671 previously (He et al., 2003), as were isogenic strains harboring deletions of *DCP2*  
672 (CFY1016), *EDC3* (CFY25), *PAT1* (SYY2674), *LSM1* (SYY2680), or *DHH1* (SYY2686), or  
673 the *dcp2-N245* truncation of the Dcp2 C-terminal domain (SYY2385) and alleles thereof (He  
674 and Jacobson, 2015a). Isogenic strains harboring the C-terminally truncated, catalytically  
675 deficient *dcp2-E153Q-N245* (SYY2750) and *dcp2-E198Q-N245* (SYY2755) alleles or  
676 deletions of *SCD6* (SSY2352), *SKI2* (HFY1170), *SKI7* (SYY17), or both *SKI2* and *SKI7*  
677 (SYY21) were constructed by gene replacement (Guthrie and Fink, 1991) using DNA  
678 fragments harboring *dcp2-E153Q-N245::KanMX6*, *dcp2-E198Q-N245::KanMX6*,  
679 *scd6::KanMX6*, *ski2::URA3*, *ski7::URA3*, or *ski2::URA3* and *ski7::ADE2* null alleles,  
680 respectively. Double mutant strains *dcp2-N245 xrn1Δ* (SYY2887), *dcp2-E153Q-N245 xrn1Δ*  
681 (SYY2897), and *dcp2-E198Q-N245 xrn1Δ* (SYY2901) were constructed by gene replacement  
682 using DNA fragments harboring the *xrn1::ADE2* null allele. Double mutant strains *dcp2-N245*  
683 *ski2Δ* (SYY2889), *dcp2-N245 ski7Δ* (SYY2893) and *upf1Δ dhh1Δ* (SYY2700) were  
684 constructed by gene replacement using DNA fragments harboring *ski2::URA3*, *ski7::URA3*,  
685 and *dhh1::ADE2* null alleles, respectively. Plasmids harboring these knock-in or knock-out  
686 alleles are described in Supplementary Table 2.

687

### 688 **Cell growth and RNA isolation**



689 Cells were all grown in YEPD media at 30°C. In each case, cells (15 ml) were grown to  
690 an OD<sub>600</sub> of 0.7 and harvested by centrifugation. Cell pellets were frozen on dry ice and then  
691 stored at -80°C until RNA isolation. The procedures for RNA isolation were as previously  
692 described (He and Jacobson, 1995).

693

#### 694 **RNA-Seq library preparation and sequencing**

695 Procedures for RNA-Seq library construction were as previously described (Celik et  
696 al., 2017). In brief, total RNA was treated with Baseline-zero DNase (Epicenter) to remove  
697 any genomic DNA contamination. Five micrograms of DNase-treated total RNA was then  
698 depleted of rRNAs using the Illumina yeast RiboZero Removal Kit and the resulting RNA was  
699 used for RNA-Seq library preparation. Multiplex strand-specific cDNA libraries were  
700 constructed using the Illumina TruSeq Stranded mRNA LT Sample Prep Kit. Three  
701 independent cDNA libraries were prepared for each yeast strain analyzed. Total RNA cDNA  
702 libraries were sequenced on the Illumina HiSeq4000 platform at Beijing Genomics Institute.  
703 Four independent libraries were pooled into a single lane and single-end 50-cycle sequencing  
704 was carried out for all cDNA libraries.

705

#### 706 **Northern analysis**

707 Procedures for northern blotting were as previously described (He and Jacobson,  
708 1995). In each case, the blot was hybridized to a random primed probe for a specific  
709 transcript, with *SCR1* RNA serving as a loading control. Transcript-specific signals on  
710 northern blots were determined with a FUJI BAS-2500 analyzer. DNA fragments from the  
711 coding regions of specific genes were amplified by PCR using the oligonucleotides listed in

712 Supplementary Table 3 and these DNA fragments were used as probes for the northern  
713 analyses. Probes generated for these analyses included *CIT2* nt 1-500, *SDS23* nt 1-500,  
714 *HOS2* nt 1-500, *PYK1* nt 1-500, *DIF1* nt 1-400, *AGA1* nt 1-500, *BUR6* nt 1-429, *LSM3* nt 1-  
715 270, *HXT6* nt 1-470, *GPH1* nt 1-500, *HXK1* nt 60-480, *CHA1* nt 1-500, *RTC3* nt 1-336, *NQM1*  
716 nt 481-1002, *PGM2* nt 1201-1710, *TMA10* nt 1-260, *GAD1* nt 1-480, *SPG4* nt 1-340, *MUP3*  
717 nt 1-500, *GTT2* nt 1-500, *RPP1A* nt 1-321, *TMA19* nt 1-500, *GPP2* nt 1-500, *YIL164C* nt 201-  
718 600, *THI22* nt 1207-1700, *EST1* nt 1621-2094, *TRP1* nt 1-675, *ALR2* nt 1-500, *GDH1* nt  
719 766-1365, *ARL1* nt 1-552, *DAL3* nt 1-588, *YGL117W* nt 95-691, *RPS9A* nt 599-1095, *SUC2*  
720 nt 1001-1599, *CPA1* nt 668-1236, *HIS4* nt 97-2328, *SER3* nt 811-1410, *HAC1* nt 662-913  
721 and *HSP82* nt 1544-2130.

722

## 723 **Bioinformatic methods**

### 724 **i) General computational methods**

725 All statistical analyses were carried out using the R statistical programming  
726 environment, versions 3.3.2 and 3.3.4. R packages ggplot2, gplots, plyr, reshape2, and  
727 gridExtra were used for data pre-processing and visualization. Biostrings, BiocParallel,  
728 doSnow, and doParallel were used for parallel processing. Statistical tests were performed  
729 using built-in functions in base R distributions. Hierarchical clustering was performed using  
730 Euclidian distances between libraries and transcripts with complete linkage. Non-finite  
731 (division by 0) and undefined (0 divided by 0) values were removed prior to clustering. The  
732 heights of the clustering tree branches indicate distance between two libraries. We used  
733 Fisher's exact test to assess different subsets of transcripts for either enrichment or depletion  
734 of a particular group of transcripts. We used external data (codon protection index, codon

735 optimality, and protein abundance) as presented by the respective authors without any further  
736 refinement. Transcripts that were not included in these datasets were discarded prior to  
737 statistical testing.

738

## 739 **ii) Analysis of differential mRNA expression**

740 Transcripts differentially expressed in each of the mutant strains relative to the  
741 corresponding wild-type strain were identified using bioinformatics pipelines described  
742 previously (Celik et al., 2017). In brief, the *Saccharomyces cerevisiae* R64-2-1 S288C  
743 reference genome assembly (sacCer3) was used to construct a yeast transcriptome  
744 comprised of 7473 transcripts. This transcriptome includes all annotated protein-coding  
745 sequences, functional and non-coding RNAs, and the unspliced isoforms of all intron-  
746 containing genes, but excludes all of the autonomous replicating sequences and long  
747 terminal repeats of transposable elements. The RSEM program (Li and Dewey, 2011) was  
748 used to map sequence reads to the transcriptome and to quantify the levels of individual  
749 mRNAs with settings --bowtie-m 30 --no-bam-output --forward-prob 0. The expected read  
750 counts for individual mRNAs from RSEM were considered as the number of reads mapped to  
751 each transcript and were then imported into the Bioconductor DESeq package (Anders and  
752 Huber, 2010) for differential expression analysis. The Benjamini-Hochberg procedure was  
753 used for multiple testing corrections. To account for replicate variability, we used a false  
754 discovery threshold of 0.01 (1%) instead of an arbitrary fold change cutoff as the criterion for  
755 differential expression.

756

## 757 **iii) Analysis of potential mechanisms of mRNA decay**

758 Our expression analysis identified the transcripts regulated by Pat1, Lsm1, and Dhh1.  
759 To assess the potential decay mechanisms for the respective sets of transcripts, we analyzed  
760 the expression patterns of these mRNAs in mutant cells deficient in decapping or 5' to 3'  
761 exoribonuclease activities. In addition, to assess the degree of co-translational decay, we  
762 also analyzed the codon protection indices (Pelechano et al., 2015) of these mRNAs in wild-  
763 type yeast cells under normal growth conditions. In our analyses, transcripts regulated by  
764 Pat1, Lsm1, and Dhh1 could be divided into six different subgroups. The up-regulated  
765 transcripts were grouped into Up-o-d, Up-o-pl, and Up-a-pld and the down-regulated  
766 transcripts were grouped into Down-o-d, Down-o-pl, and Down-a-pld subgroups (see  
767 Results). Boxplots were used to examine the distribution and the median value of both the  
768 relative levels and the codon protection indices for transcripts from each of these six  
769 subgroups. The relative levels of individual mRNAs in mutant cells were determined by  
770 comparison to their levels in wild-type cells. The expression data for *dcp1Δ*, *dcp2Δ*, and  
771 *xrn1Δ* cells were from our previously published work (Celik et al., 2017). Codon protection  
772 indices for individual mRNAs were generated by Pelechano and colleagues based on their  
773 data from 5'P sequencing of yeast decay intermediates (Pelechano et al., 2015). In their  
774 study, the codon protection index of a specific transcript is defined as the ratio of sequencing  
775 reads in the ribosome protected frame over the average reads of the non-protected frames.  
776 Codon protection index values greater than 1 are indicative of co-translational decay.

777

#### 778 **iv) Analysis of intrinsic properties associated with mRNA translation**

779 To assess the potential links between translation and the functions of Pat1, Lsm1, and  
780 Dhh1 in mRNA decay, we examined several intrinsic properties associated with mRNA

781 translation for transcripts regulated by these three factors. We analyzed the pattern and  
782 distribution of the average codon optimality score, the average ribosome density, and the  
783 estimated protein abundance for transcripts from the six subgroups of mRNAs controlled by  
784 Pat1, Lsm1, and Dhh1. In our analysis, the average codon optimality score of individual  
785 mRNAs was calculated based on the optimal or non-optimal codon scores defined by  
786 Pechmann and Frydman (Pechmann and Frydman, 2013). The average ribosome density of  
787 individual mRNAs was derived from published ribosome profiling and RNA-Seq data from  
788 wild-type yeast cells grown under standard conditions (Young et al., 2015) and was  
789 calculated as previously described (Celik et al. 2017). In brief, rawfastq files were  
790 downloaded and sequence reads were trimmed for adapter sequences using cutadapt with  
791 settings -a CTGTAGGCA -q 10 --trim-n -m 10. After adapter trimming, sequence reads were  
792 mapped to the transcriptome using bowtie (Langmead et al., 2009) with settings -m4 -n 2 -l  
793 15 --suppress 1,6,7,8 --best --strata. After bowtie alignment, the riboSeqR (Chung et al.,2015)  
794 was used for preliminary visualizations and frame calling. For our ribosome occupancy  
795 calculations, we selected read lengths that showed a strong preference (>80%) to a specific  
796 reading frame. After this filtering, the ribosome occupancy of individual mRNAs was  
797 calculated as  $\text{coverage\_ribo}/\text{coverage\_rna}$ , yielding a single value of ribosome occupancy for  
798 each mRNAs. We used these values to compare the translation efficiency of transcripts from  
799 different subgroups of mRNAs that are differentially expressed in *pat1* $\Delta$ , *lsm1* $\Delta$ , and *dhh1* $\Delta$   
800 strains. We excluded transcripts that had no RNA-Seq reads mapping to their ORFs in our  
801 analysis. Protein abundance levels came directly from the curated PaxDb (Protein  
802 Abundances Across Organisms) database (Wang et al., 2012) and are the scaled aggregated  
803 estimates over several proteomic data sets.

804

805 **v) Deposited Data**

806 The data discussed in this publication have been deposited in NCBI's Gene Expression Omnibus and  
807 are accessible through GEO Series accession number GSE107841 at the link  
808 <https://www.ncbi.nlm.nih.gov/geo/query/acc.cgi?acc=GSE107841>.

809

810 **Acknowledgments**

811 This work was supported by grants to A.J. (5R01 GM27757-37 and 1R35GM122468-  
812 01) from the U.S. National Institutes of Health.

813

814 **REFERENCES**

815

816 AGLIETTI, R. A., FLOOR, S. N., MCCLENDON, C. L., JACOBSON, M. P. & GROSS, J. D. 2013.  
817 Active site conformational dynamics are coupled to catalysis in the mRNA decapping enzyme Dcp2.  
818 *Structure*, 21, 1571-80.

819 ANDERS, S. & HUBER, W. 2010. Differential expression analysis for sequence count data. *Genome*  
820 *Biol*, 11, R106.

821 ARRIBERE, J. A., DOUDNA, J. A. & GILBERT, W. V. 2011. Reconsidering movement of eukaryotic  
822 mRNAs between polysomes and P bodies. *Mol Cell*, 44, 745-58.

823 BADIS, G., SAVEANU, C., FROMONT-RACINE, M. & JACQUIER, A. 2004. Targeted mRNA  
824 degradation by deadenylation-independent decapping. *Molecular cell*, 15, 5-15.

825 BEELMAN, C. A., STEVENS, A., CAPONIGRO, G., LAGRANDEUR, T. E., HATFIELD, L.,  
826 FORTNER, D. M. & PARKER, R. 1996. An essential component of the decapping enzyme required  
827 for normal rates of mRNA turnover. *Nature*, 382, 642-6.

828 BEHM-ANSMANT, I., REHWINKEL, J., DOERKS, T., STARK, A., BORK, P. & IZAURRALDE, E.  
829 2006. mRNA degradation by miRNAs and GW182 requires both CCR4:NOT deadenylase and  
830 DCP1:DCP2 decapping complexes. *Genes Dev.*, 20, 1885-1898.

831 BORJA, M. S., PIOTUKH, K., FREUND, C. & GROSS, J. D. 2011. Dcp1 links coactivators of mRNA  
832 decapping to Dcp2 by proline recognition. *RNA*, 17, 278-90.

833 BOUVERET, E., RIGAUT, G., SHEVCHENKO, A., WILM, M. & SERAPHIN, B. 2000. A Sm-like  
834 protein complex that participates in mRNA degradation. *EMBO J.*, 19, 1661-1671.

835 CELIK, A., BAKER, R., HE, F. & JACOBSON, A. 2017. High-resolution profiling of NMD targets in  
836 yeast reveals translational fidelity as a basis for substrate selection. *RNA*, 23, 735-748.

837 CHARENTON, C., GAUDON-PLESSE, C., FOURATI, Z., TAVERNITI, V., BACK, R., KOLESNIKOVA,  
838 O., SERAPHIN, B. & GRAILLE, M. 2017. A unique surface on Pat1 C-terminal domain directly  
839 interacts with Dcp2 decapping enzyme and Xrn1 5'-3' mRNA exonuclease in yeast. *Proc Natl Acad*  
840 *Sci U S A*, 114, E9493-E9501.

- 841 CHARENTON, C., TAVERNITI, V., GAUDON-PLESSE, C., BACK, R., SERAPHIN, B. & GRAILLE, M.  
842 2016. Structure of the active form of Dcp1-Dcp2 decapping enzyme bound to m7GDP and its Edc3  
843 activator. *Nat Struct Mol Biol*, 23, 982-986.
- 844 CHOWDHURY, A., MUKHOPADHYAY, J. & THARUN, S. 2007. The decapping activator Lsm1p-7p-  
845 Pat1p complex has the intrinsic ability to distinguish between oligoadenylated and polyadenylated  
846 RNAs. *RNA*, 13, 998-1016.
- 847 COLLER, J. & PARKER, R. 2004. Eukaryotic mRNA decapping. *Annu Rev Biochem*, 73, 861-90.
- 848 COLLER, J. & PARKER, R. 2005. General translational repression by activators of mRNA decapping.  
849 *Cell*, 122, 875-86.
- 850 COLLER, J. M., TUCKER, M., SHETH, U., VALENCIA-SANCHEZ, M. A. & PARKER, R. 2001. The  
851 DEAD box helicase, Dhh1p, functions in mRNA decapping and interacts with both the decapping and  
852 deadenylase complexes. *RNA*, 7, 1717-27.
- 853 DECKER, C. J. & PARKER, R. 1993. A turnover pathway for both stable and unstable mRNAs in  
854 yeast: evidence for a requirement for deadenylation. *Genes Dev.*, 7, 1632-1643.
- 855 DESHMUKH, M. V., JONES, B. N., QUANG-DANG, D. U., FLINDERS, J., FLOOR, S. N., KIM, C.,  
856 JEMIELITY, J., KALEK, M., DARZYNKIEWICZ, E. & GROSS, J. D. 2008. mRNA decapping is  
857 promoted by an RNA-binding channel in Dcp2. *Molecular cell*, 29, 324-36.
- 858 DONG, S., LI, C., ZENKLUSEN, D., SINGER, R. H., JACOBSON, A. & HE, F. 2007. YRA1  
859 Autoregulation Requires Nuclear Export and Cytoplasmic Edc3p-Mediated Degradation of Its Pre-  
860 mRNA. *Molecular Cell*, 25, 559-573.
- 861 DUNCKLEY, T. & PARKER, R. 1999. The DCP2 protein is required for mRNA decapping in  
862 *Saccharomyces cerevisiae* and contains a functional MutT motif. *The EMBO journal*, 18, 5411-22.
- 863 FENGER-GRON, M., FILLMAN, C., NORRILD, B. & LYKKE-ANDERSEN, J. 2005. Multiple  
864 processing body factors and the ARE binding protein TTP activate mRNA decapping. *Mol. Cell*, 20,  
865 905-915.
- 866 FISCHER, N. & WEIS, K. 2002. The DEAD box protein Dhh1 stimulates the decapping enzyme Dcp1.  
867 *The EMBO journal*, 21, 2788-97.



- 868 FLOOR, S. N., JONES, B. N., HERNANDEZ, G. A. & GROSS, J. D. 2010. A split active site couples  
869 cap recognition by Dcp2 to activation. *Nature structural & molecular biology*, 17, 1096-101.
- 870 FROMM, S. A., TRUFFAULT, V., KAMENZ, J., BRAUN, J. E., HOFFMANN, N. A., IZAURRALDE, E.  
871 & SPRANGERS, R. 2012. The structural basis of Edc3- and Scd6-mediated activation of the  
872 Dcp1:Dcp2 mRNA decapping complex. *EMBO J*, 31, 279-90.
- 873 GAUDON, C., CHAMBON, P. & LOSSON, R. 1999. Role of the essential yeast protein PSU1 in  
874 p6anscriptional enhancement by the ligand-dependent activation function AF-2 of nuclear receptors.  
875 *EMBO J*, 18, 2229-40.
- 876 GRUDZIEN-NOGALSKA, E. & KILEDJIAN, M. 2017. New insights into decapping enzymes and  
877 selective mRNA decay. *Wiley Interdiscip Rev RNA*, 8.
- 878 GUTHRIE, C. & FINK, G. R. 1991. *Methods in Enzymology: Molecular Biology of Saccharomyces*  
879 *cerevisiae.*, NY, Academic Press.
- 880 HARIGAYA, Y., JONES, B. N., MUHLRAD, D., GROSS, J. D. & PARKER, R. 2010. Identification and  
881 analysis of the interaction between Edc3 and Dcp2 in *Saccharomyces cerevisiae*. *Molecular and*  
882 *cellular biology*, 30, 1446-56.
- 883 HATA, H., MITSUI, H., LIU, H., BAI, Y., DENIS, C. L., SHIMIZU, Y. & SAKAI, A. 1998. Dhh1p, a  
884 putative RNA helicase, associates with the general transcription factors Pop2p and Ccr4p from  
885 *Saccharomyces cerevisiae*. *Genetics*, 148, 571-9.
- 886 HATFIELD, L., BEELMAN, C. A., STEVENS, A. & PARKER, R. 1996. Mutations in trans-acting  
887 factors affecting mRNA decapping in *Saccharomyces cerevisiae*. *Molecular and cellular biology*, 16,  
888 5830-8.
- 889 HE, F., BROWN, A. H. & JACOBSON, A. 1997. Upf1p, Nmd2p, and Upf3p are interacting  
890 components of the yeast nonsense-mediated mRNA decay pathway. *Mol Cell Biol*, 17, 1580-94.
- 891 HE, F. & JACOBSON, A. 1995. Identification of a novel component of the nonsense-mediated mRNA  
892 decay pathway by use of an interacting protein screen. *Genes Dev*, 9, 437-54.
- 893 HE, F. & JACOBSON, A. 2001. Upf1p, Nmd2p, and Upf3p regulate the decapping and exonucleolytic  
894 degradation of both nonsense-containing mRNAs and wild-type mRNAs. *Mol Cell Biol*, 21, 1515-30.

- 895 HE, F. & JACOBSON, A. 2015a. Control of mRNA decapping by positive and negative regulatory  
896 elements in the Dcp2 C-terminal domain. *RNA*, 21, 1633-47.
- 897 HE, F. & JACOBSON, A. 2015b. Nonsense-Mediated mRNA Decay: Degradation of Defective  
898 Transcripts Is Only Part of the Story. *Annu Rev Genet*, 49, 339-66.
- 899 HE, F., LI, C., ROY, B. & JACOBSON, A. 2014. Yeast Edc3 targets RPS28B mRNA for decapping by  
900 binding to a 3' untranslated region decay-inducing regulatory element. *Mol Cell Biol*, 34, 1438-51.
- 901 HE, F., LI, X., SPATRICK, P., CASILLO, R., DONG, S. & JACOBSON, A. 2003. Genome-Wide  
902 Analysis of mRNAs Regulated by the Nonsense-Mediated and 5' to 3' mRNA Decay Pathways in  
903 Yeast. *Molecular Cell*, 12, 1439-1452.
- 904 HU, W., PETZOLD, C., COLLER, J. & BAKER, K. E. 2010. Nonsense-mediated mRNA decapping  
905 occurs on polyribosomes in *Saccharomyces cerevisiae*. *Nat Struct Mol Biol*, 17, 244-7.
- 906 HU, W., SWEET, T. J., CHAMNONGPOL, S., BAKER, K. E. & COLLER, J. 2009. Co-translational  
907 mRNA decay in *Saccharomyces cerevisiae*. *Nature*, 461, 225-9.
- 908 JONAS, S. & IZAURRALDE, E. 2013. The role of disordered protein regions in the assembly of  
909 decapping complexes and RNP granules. *Genes Dev*, 27, 2628-41.
- 910 LI, B. & DEWEY, C. N. 2011. RSEM: accurate transcript quantification from RNA-Seq data with or  
911 without a reference genome. *BMC Bioinformatics*, 12, 323.
- 912 MAILLET, L. & COLLART, M. A. 2002. Interaction between Not1p, a component of the Ccr4-not  
913 complex, a global regulator of transcription, and Dhh1p, a putative RNA helicase. *The Journal of*  
914 *biological chemistry*, 277, 2835-42.
- 915 MATHYS, H., BASQUIN, J., OZGUR, S., CZARNOCKI-CIECIURA, M., BONNEAU, F., AARTSE, A.,  
916 DZIEMBOWSKI, A., NOWOTNY, M., CONTI, E. & FILIPOWICZ, W. 2014. Structural and biochemical  
917 insights to the role of the CCR4-NOT complex and DDX6 ATPase in microRNA repression. *Mol Cell*,  
918 54, 751-65.
- 919 MISHIMA, Y. & TOMARI, Y. 2016. Codon Usage and 3' UTR Length Determine Maternal mRNA  
920 Stability in Zebrafish. *Mol Cell*, 61, 874-85.

- 921 MUGRIDGE, J. S., ZIEMNIAK, M., JEMIELITY, J. & GROSS, J. D. 2016. Structural basis of mRNA-  
922 cap recognition by Dcp1-Dcp2. *Nat Struct Mol Biol*, 23, 987-994.
- 923 NICHOLSON, P. & MUHLEMANN, O. 2010. Cutting the nonsense: the degradation of PTC-containing  
924 mRNAs. *Biochemical Society transactions*, 38, 1615-20.
- 925 NISSAN, T., RAJYAGURU, P., SHE, M., SONG, H. & PARKER, R. 2010. Decapping activators in  
926 *Saccharomyces cerevisiae* act by multiple mechanisms. *Molecular cell*, 39, 773-83.
- 927 OZGUR, S., BASQUIN, J., KAMENSKA, A., FILIPOWICZ, W., STANDART, N. & CONTI, E. 2015.  
928 Structure of a Human 4E-T/DDX6/CNOT1 Complex Reveals the Different Interplay of DDX6-Binding  
929 Proteins with the CCR4-NOT Complex. *Cell Rep*, 13, 703-711.
- 930 PAQUETTE, D. R., TIBBLE, R. W., DAIFUKU, T. S. & GROSS, J. D. 2018. Control of mRNA  
931 decapping by autoinhibition. *Nucleic Acids Res*.
- 932 PARKER, R. 2012. RNA degradation in *Saccharomyces cerevisiae*. *Genetics*, 191, 671-702.
- 933 PECHMANN, S. & FRYDMAN, J. 2013. Evolutionary conservation of codon optimality reveals hidden  
934 signatures of cotranslational folding. *Nat Struct Mol Biol*, 20, 237-43.
- 935 PELECHANO, V., WEI, W. & STEINMETZ, L. M. 2015. Widespread Co-translational RNA Decay  
936 Reveals Ribosome Dynamics. *Cell*, 161, 1400-12.
- 937 PRESNYAK, V., ALHUSAINI, N., CHEN, Y. H., MARTIN, S., MORRIS, N., KLINE, N., OLSON, S.,  
938 WEINBERG, D., BAKER, K. E., GRAVELEY, B. R. & COLLER, J. 2015. Codon optimality is a major  
939 determinant of mRNA stability. *Cell*, 160, 1111-24.
- 940 RADHAKRISHNAN, A., CHEN, Y. H., MARTIN, S., ALHUSAINI, N., GREEN, R. & COLLER, J. 2016.  
941 The DEAD-Box Protein Dhh1p Couples mRNA Decay and Translation by Monitoring Codon  
942 Optimality. *Cell*, 167, 122-132 e9.
- 943 ROY, B. & JACOBSON, A. 2013. The intimate relationships of mRNA decay and translation. *Trends*  
944 *Genet*, 29, 691-9.
- 945 SHARIF, H. & CONTI, E. 2013. Architecture of the Lsm1-7-Pat1 complex: a conserved assembly in  
946 eukaryotic mRNA turnover. *Cell Rep*, 5, 283-91.

- 947 SHARIF, H., OZGUR, S., SHARMA, K., BASQUIN, C., URLAUB, H. & CONTI, E. 2013. Structural  
948 analysis of the yeast Dhh1-Pat1 complex reveals how Dhh1 engages Pat1, Edc3 and RNA in mutually  
949 exclusive interactions. *Nucleic acids research*.
- 950 SHE, M., DECKER, C. J., CHEN, N., TUMATI, S., PARKER, R. & SONG, H. 2006. Crystal structure  
951 and functional analysis of Dcp2p from *Schizosaccharomyces pombe*. *Nature structural & molecular*  
952 *biology*, 13, 63-70.
- 953 SHE, M., DECKER, C. J., SUNDRAMURTHY, K., LIU, Y., CHEN, N., PARKER, R. & SONG, H. 2004.  
954 Crystal structure of Dcp1p and its functional implications in mRNA decapping. *Nature structural &*  
955 *molecular biology*, 11, 249-56.
- 956 SHE, M., DECKER, C. J., SVERGUN, D. I., ROUND, A., CHEN, N., MUHLRAD, D., PARKER, R. &  
957 SONG, H. 2008. Structural basis of dcp2 recognition and activation by dcp1. *Molecular cell*, 29, 337-  
958 49.
- 959 SWEET, T., KOVALAK, C. & COLLER, J. 2012. The DEAD-box protein Dhh1 promotes decapping by  
960 slowing ribosome movement. *PLoS biology*, 10, e1001342.
- 961 THARUN, S., HE, W., MAYES, A. E., LENNERTZ, P., BEGGS, J. D. & PARKER, R. 2000. Yeast Sm-  
962 like proteins function in mRNA decapping and decay. *Nature*, 404, 515-8.
- 963 THARUN, S. & PARKER, R. 1999. Analysis of mutations in the yeast mRNA decapping enzyme.  
964 *Genetics*, 151, 1273-85.
- 965 TRITSCHLER, F., BRAUN, J. E., EULALIO, A., TRUFFAULT, V., IZAURRALDE, E. &  
966 WEICHENRIEDER, O. 2009. Structural basis for the mutually exclusive anchoring of P body  
967 components EDC3 and Tral to the DEAD box protein DDX6/Me31B. *Mol Cell*, 33, 661-8.
- 968 VALKOV, E., JONAS, S. & WEICHENRIEDER, O. 2017. Mille viae in eukaryotic mRNA decapping.  
969 *Curr Opin Struct Biol*, 47, 40-51.
- 970 WANG, M., HERRMANN, C. J., SIMONOVIC, M., SZKLARCZYK, D. & VON MERING, C. 2015.  
971 Version 4.0 of PaxDb: Protein abundance data, integrated across model organisms, tissues, and cell-  
972 lines. *Proteomics*, 15, 3163-8.

- 973 WANG, M., WEISS, M., SIMONOVIC, M., HAERTINGER, G., SCHRIMPF, S. P., HENGARTNER, M.  
974 O. & VON MERING, C. 2012. PaxDb, a database of protein abundance averages across all three  
975 domains of life. *Mol Cell Proteomics*, 11, 492-500.
- 976 WU, D., MUHLRAD, D., BOWLER, M. W., JIANG, S., LIU, Z., PARKER, R. & SONG, H. 2014. Lsm2  
977 and Lsm3 bridge the interaction of the Lsm1-7 complex with Pat1 for decapping activation. *Cell Res*,  
978 24, 233-46.
- 979 WURM, J. P., HOLDERMANN, I., OVERBECK, J. H., MAYER, P. H. O. & SPRANGERS, R. 2017.  
980 Changes in conformational equilibria regulate the activity of the Dcp2 decapping enzyme. *Proc Natl*  
981 *Acad Sci U S A*, 114, 6034-6039.
- 982 WURM, J. P., OVERBECK, J. & SPRANGERS, R. 2016. The *S. pombe* mRNA decapping complex  
983 recruits cofactors and an Edc1-like activator through a single dynamic surface. *RNA*, 22, 1360-72.
- 984 YAMASHITA, A., CHANG, T. C., YAMASHITA, Y., ZHU, W., ZHONG, Z., CHEN, C. Y. & SHYU, A. B.  
985 2005. Concerted action of poly(A) nucleases and decapping enzyme in mammalian mRNA turnover.  
986 *Nat Struct Mol Biol*, 12, 1054-63.
- 987 YOUNG, D. J., GUYDOSH, N. R., ZHANG, F., HINNEBUSCH, A. G. & GREEN, R. 2015. Rli1/ABCE1  
988 Recycles Terminating Ribosomes and Controls Translation Reinitiation in 3'UTRs In Vivo. *Cell*, 162,  
989 872-84.
- 990
- 991

992 **FIGURE LEGENDS**

993 **Figure 1. Identification of transcripts differentially expressed in *dcp2-N245*, *dcp2-***  
994 ***E153Q-N245*, and *dcp2-E198Q-N245* cells.**

995 A. Violin and box plots displaying the average and median read count distributions of the  
996 RNA-Seq libraries from *WT*, *dcp2-N245*, *dcp2-E153Q-N245*, and *dcp2-E198Q-N245* strains  
997 in three independent experiments.

998 B. Venn diagram displaying the relationships between transcripts up-regulated in *dcp2-N245*,  
999 *dcp2-E153Q-N245*, and *dcp2-E198Q-N245* cells.

1000 C. Venn diagram displaying the relationships between transcripts down-regulated in *dcp2-*  
1001 *N245*, *dcp2-E153Q-N245*, and *dcp2-E198Q-N245* cells.

1002 D. Scatterplots comparing the normalized read counts between the *WT* and the *dcp2-N245*,  
1003 *dcp2-E153Q-N245*, or *dcp2-E198Q-N245* strains for transcripts differentially expressed in  
1004 each of the mutant strains. Left panel, comparison for the 616 up- and 1025 down-regulated  
1005 transcripts in *dcp2-N245* cells; middle panel, comparison for the 1921 up- and 1845 down-  
1006 regulated transcripts in *dcp2-E153Q-N245* cells; and right panel, comparison for the 1346 up-  
1007 and 1428 down-regulated transcripts in *dcp2-E198Q-N245*.

1008 E. Scatterplots comparing the normalized read counts for transcripts differentially expressed  
1009 between the *dcp2-E153Q-N245* and *dcp2-E198Q-N245* strains, or in these two strains  
1010 compared to the *dcp-N245* strain. Left panel, comparison for 21 differentially expressed  
1011 transcripts between *dcp2-E153Q-N245* and *dcp2-E198Q-N245* cells; middle panel,  
1012 comparison for the 1658 up- and 1690 down-regulated transcripts in *dcp2-E153Q-N245* cells;

1013 and right panel, comparison for the 1113 up- and 1090 down-regulated transcripts in *dcp2-*  
1014 *E198Q-N245* cells.

1015 The log<sub>2</sub> read count values of individual transcripts were used in the analyses of parts D and  
1016 E, and the y=x line is shown in red.

1017

1018 **Figure 2. Elimination of the Dcp2 C-terminal domain deregulates mRNA decapping *in***  
1019 ***vivo*.**

1020 A. Yeast cells harboring a deletion of the large Dcp2 C-terminal domain exhibit a significantly  
1021 different genome-wide expression pattern from cells severely comprised in decapping activity  
1022 or completely lacking decapping or 5' to 3' exoribonuclease activities. Scatterplot matrices  
1023 were used to compare the relative levels of all transcripts in the yeast transcriptome in  
1024 different mutant strains. The relative levels of individual mRNAs in each of the mutant strains  
1025 were determined by comparisons to the appropriate wild-type strain. Data for the *dcp1Δ*,  
1026 *dcp2Δ*, and *xrn1Δ* strains were from our previous study (*Celik et al., 2017*). Log<sub>2</sub> transformed  
1027 data were used for this analysis and Pearson correlation coefficients for each comparison are  
1028 shown in red.

1029 B. Yeast cells harboring a deletion of the large Dcp2 C-terminal domain exhibit accelerated  
1030 and indiscriminate decapping of mRNAs. Eleven representative transcripts (nine typical  
1031 decapping substrates and two atypical decapping substrates) from the group of transcripts  
1032 down-regulated uniquely in *dcp2-N245* cells were selected and their levels of expression in  
1033 the indicated strains were analyzed by northern blotting. In each case, a specific random-  
1034 primed probe was hybridized to the blot and the *SCR1* transcript served as a loading control.  
1035 The relative levels of specific transcripts in the mutant strains were determined by

1036 comparisons to their levels in the wild-type strain (indicated by the values under each blot).  
1037 For presentation purposes, one of the control *SCR1* blots is duplicated and is indicated by the  
1038 lower case letter “a.” The *SER3* locus produces two different transcripts and only the levels of  
1039 the short isoform (indicated by #) are presented.

1040

1041

1042 **Figure 3. Identification of transcripts controlled by Pat1, Lsm1, and Dhh1.**

1043 A. Violin and box plots displaying the average and median read count distributions of the  
1044 RNA-Seq libraries from the *WT*, *pat1Δ*, *lsm1Δ*, and *dhh1Δ* strains in three independent  
1045 experiments.

1046 B. Venn diagram displaying the relationships between transcripts up-regulated in *pat1Δ*,  
1047 *lsm1Δ*, and *dhh1Δ* cells.

1048 C. Venn diagram displaying the relationships between transcripts down-regulated in *pat1Δ*,  
1049 *lsm1Δ*, and *dhh1Δ* cells.

1050 D. Scatterplots comparing the normalized read counts between the *WT* and the *pat1Δ*,  
1051 *lsm1Δ*, or *dhh1Δ* strains for transcripts differentially expressed in each of the mutant strains.  
1052 Left panel, comparison for the 955 up- and 681 down-regulated transcripts in *pat1Δ* cells;  
1053 middle panel, comparison for the 940 up- and 685 down-regulated transcripts in *lsm1Δ* cells;  
1054 and right panel, comparison for the 1098 up- and 788 down-regulated transcripts in *dhh1Δ*  
1055 cells.



1056 E. Scatterplots comparing the normalized read counts between the *pat1* $\Delta$  and *lsm1* $\Delta$  strains  
1057 for all transcripts, or between the *dhh1* $\Delta$  strain and the *lsm1* $\Delta$  and *pat1* $\Delta$  strains for  
1058 transcripts differentially expressed in these two strains compared to the *dhh1* $\Delta$  strain. Left  
1059 panel, comparison for all transcripts between the *pat1* $\Delta$  and *lsm1* $\Delta$  strains, four differentially  
1060 expressed transcripts are indicated by red dots; middle panel, comparison for the 1385 up-  
1061 and 1037 down-regulated transcripts in the *lsm1* $\Delta$  strain with respect to the transcripts of the  
1062 *dhh1* $\Delta$  strain; and right panel, comparison for the 1332 up- and 874 down-regulated  
1063 transcripts in the *pat1* $\Delta$  strain with respect to the transcripts of the *dhh1* $\Delta$  strain.

1064 For A to E, all analyses were as described in the legend to Figure 1

1065

1066 **Figure 4. Transcripts from different subgroups of mRNAs regulated by Pat1, Lsm1, or**  
1067 **Dhh1 have distinct expression patterns in cells deficient in decapping or 5' to 3'**  
1068 **exoribonuclease activities and also exhibit distinct extents of co-translational mRNA**  
1069 **decay.**

1070 Transcripts up-regulated in *pat1* $\Delta$ , *lsm1* $\Delta$ , or *dhh1* $\Delta$  strains were divided into three non-  
1071 overlapping *Up-o-d*, *Up-o-pl*, and *Up-a-pld* subgroups, representing transcripts up-regulated  
1072 only in *dhh1* $\Delta$  cells, only in *pat1* $\Delta$  and *lsm1* $\Delta$  cells, and in all three deletion strains,  
1073 respectively. Similarly, transcripts down-regulated in the three deletion strains were also  
1074 divided into three non-overlapping *Down-o-d*, *Down-o-pl*, and *Down-a-pld* subgroups,  
1075 representing transcripts down-regulated only in *dhh1* $\Delta$  cells, only in *pat1* $\Delta$  and *lsm1* $\Delta$  cells,  
1076 and in all three deletion strains, respectively. Transcripts not regulated by Pat1, Lsm1, or  
1077 Dhh1 were put into the *none* subgroup. Boxplots were used to depict the distributions of both

1078 the relative expression levels and the codon protection indices for transcripts in each of these  
1079 subgroups. In these analyses, the relative expression levels of individual mRNAs in each of  
1080 the mutant strains were determined by comparisons to the corresponding wild-type strain.  
1081 The codon protection index of individual mRNAs was based on 5'P seq experiments of wild-  
1082 type cells under normal growth conditions (Pelechano et al., 2015). Log<sub>2</sub> transformed data  
1083 were used to generate all plots except for panel G, and the color codes for the boxplots  
1084 include: blue for the up-regulated subgroups, red for the down-regulated subgroups, and  
1085 green for transcripts not regulated by Pat1, Lsm1, or Dhh1.

1086 A to F. Boxplots showing the distributions of the relative expression levels for different  
1087 subgroups in *dcp1Δ* (A), *dcp2Δ* (B), *xrn1Δ* (C), *dcp2-N245* (D), *dcp2-E153Q-N245* (E), and  
1088 *dcp2-E198Q-N245* (F) cells.

1089 G. Boxplots showing the distributions of the codon protection indices for different subgroups.

1090

1091 **Figure 5. Validation of representative transcripts regulated by Pat1, Lsm1, or Dhh1.**

1092 Representative transcripts from five of the subgroups (Up-o-d, Up-o-pl, Up-a-pld, Down-o-pl,  
1093 and Down-a-pld) described in Figure 4 were selected and their levels of expression in the  
1094 indicated strains were analyzed by northern blotting as described in the legend to Figure 2B.  
1095 For presentation purposes, the control *SCR1* blots contain duplicates and the identical blots  
1096 are indicated by lower case letters (a, b, c, d, e, and f, respectively).

1097

1098 **Figure 6. Transcripts from different subgroups of mRNAs regulated by Pat1, Lsm1, and**  
1099 **Dhh1 have distinct translational properties.**

1100 Boxplots were used to examine the distributions of average codon optimality scores,  
1101 ribosome occupancies, and scaled protein abundances for transcripts from each of the six  
1102 regulation subgroups described in Figure 4. In this analysis, codon optimality scores are  
1103 based on the normalized tRNA adaptation index (Pechmann and Frydman, 2013), ribosome  
1104 occupancies are based on ribosome footprint profiling data of wild-type cells under normal  
1105 growth conditions (Young et al., 2015), and protein abundance scores are based on curated  
1106 data in a database (Wang et al., 2015, Wang et al., 2012).

1107 **A to C.** Boxplots showing the distributions of scaled average codon optimality scores (A), and  
1108 Log<sub>2</sub> transformed data of ribosome occupancies (B) or scaled protein abundances (C).  
1109 Boxplots are color coded as described in the legend to Figure 4.

1110

1111 **Figure 7. Decapping activators have distinct targeting specificities and display**  
1112 **dynamic regulation.**

1113 A. Venn diagram depicting minimal significant overlaps between transcripts targeted by the  
1114 Upf factors and those targeted by Dhh1 or Pat1 and Lsm1.

1115 B. Two-dimensional clustering analysis of differentially expressed transcripts showing distinct  
1116 expression patterns of yeast cells harboring deletions of the *UPF1*, *UPF2*, *UPF3*, *PAT1*,  
1117 *LSM1*, or *DHH1* genes. The relative levels of individual mRNAs in the deletion strains were  
1118 determined by comparisons to the corresponding wild-type strain. Log<sub>2</sub> transformed ratios  
1119 were used for clustering analyses. The data for the NMD factors were from our previous  
1120 study (Celik et al., 2017). Color coding used to represent fold change in expression employs  
1121 red to indicate increases in levels and blue to indicate decreases in levels, with intermediate  
1122 changes scaled to lighter versions of each color.

1123 C. Venn diagrams depicting the enrichment of NMD-targeted transcripts in the Down-o-d  
1124 subgroup, but not in the Down-a-pld and Down-o-pl subgroups of mRNAs indirectly controlled  
1125 by Pat1, Lsm1, and Dhh1.

1126 D. Northern blotting analysis of representative transcripts from the Down-o-d subgroup of  
1127 mRNAs that are targeted by NMD. Five transcripts were selected, and northern blotting and  
1128 transcript quantification were as described in the legend to Figure 2B.

1129

1130 **Figure 1-figure supplement 1. RNA-Seq libraries generated from *WT*, *dcp2-N245*, *dcp2-*  
1131 *E153Q-N245*, and *dcp2-E198Q-N245* strains exhibit good correlation between three  
1132 different biological replicates.**

1133 Matrices showing the Pearson correlation coefficients among three independent experiments  
1134 for RNA-Seq libraries generated from *WT*, *dcp2-N245*, *dcp2-E153Q-N245*, and *dcp2-E198Q-*  
1135 *N245* cells.

1136

1137 **Figure 1-figure supplement 2. Yeast transcripts stabilized by inactivating the catalytic  
1138 function of Dcp2 are mostly decapping substrates.**

1139 A to D. Venn diagrams showing the extent of overlap between transcripts up-regulated in  
1140 *dcp2-E153Q-N245* and *dcp2-E198Q-N245* cells and those up-regulated in *dcp1Δ* (A), *dcp2Δ*  
1141 (B), *xrn1Δ* (C), or *upf1/2/3Δ* (D) cells.

1142

1143 **Figure 1-figure supplement 3. Yeast transcripts destabilized by deletion of the large  
1144 Dcp2 C-terminal domain are not normally typical decapping substrates.**

1145 A to E. Venn diagrams depicting the extent of overlaps between the 264-transcript subset  
1146 down-regulated only in *dcp2-N245* cells (from Figure 1C) and those up-regulated in *dcp1Δ*  
1147 (A), *dcp2Δ* (B), *xrn1Δ* (C), *dcp2-E153Q-N245* (D) or *dcp2-E198Q-N245* (E) cells.

1148 F to J. Venn diagrams depicting the extent of overlaps between the entire 914-transcript set  
1149 down-regulated in *dcp2-N245* cells (from Figure 1C) and those up-regulated in *dcp1Δ* (F),  
1150 *dcp2Δ* (G), *xrn1Δ* (H), *dcp2-E153Q-N245* (I) or *dcp2-E198Q-N245* (J) cells.

1151

1152 **Figure 3-figure supplement 1. RNA-Seq libraries generated from *WT*, *pat1Δ*, *lsm1Δ*, and**  
1153 ***dhh1Δ* strains exhibit good correlation between three different biological replicates.**

1154 Matrices showing the Pearson correlation coefficients among three independent experiments  
1155 for RNA-Seq libraries generated from *WT*, *pat1Δ*, *lsm1Δ*, and *dhh1Δ* cells. Libraries from  
1156 strains shown here and in Figure 1-figure supplement 1 were generated at different times and  
1157 two independent wild-type controls were employed.

1158

1159

## 1160 **SUPPLEMENTARY FILE LEGENDS**

1161 **Supplementary Table 1. Yeast strains used in this study**

1162

1163 **Supplemental Table S2. Plasmids used in this study**

1164

1165 **Supplementary Table 3. Oligonucleotides used in this study**

1166

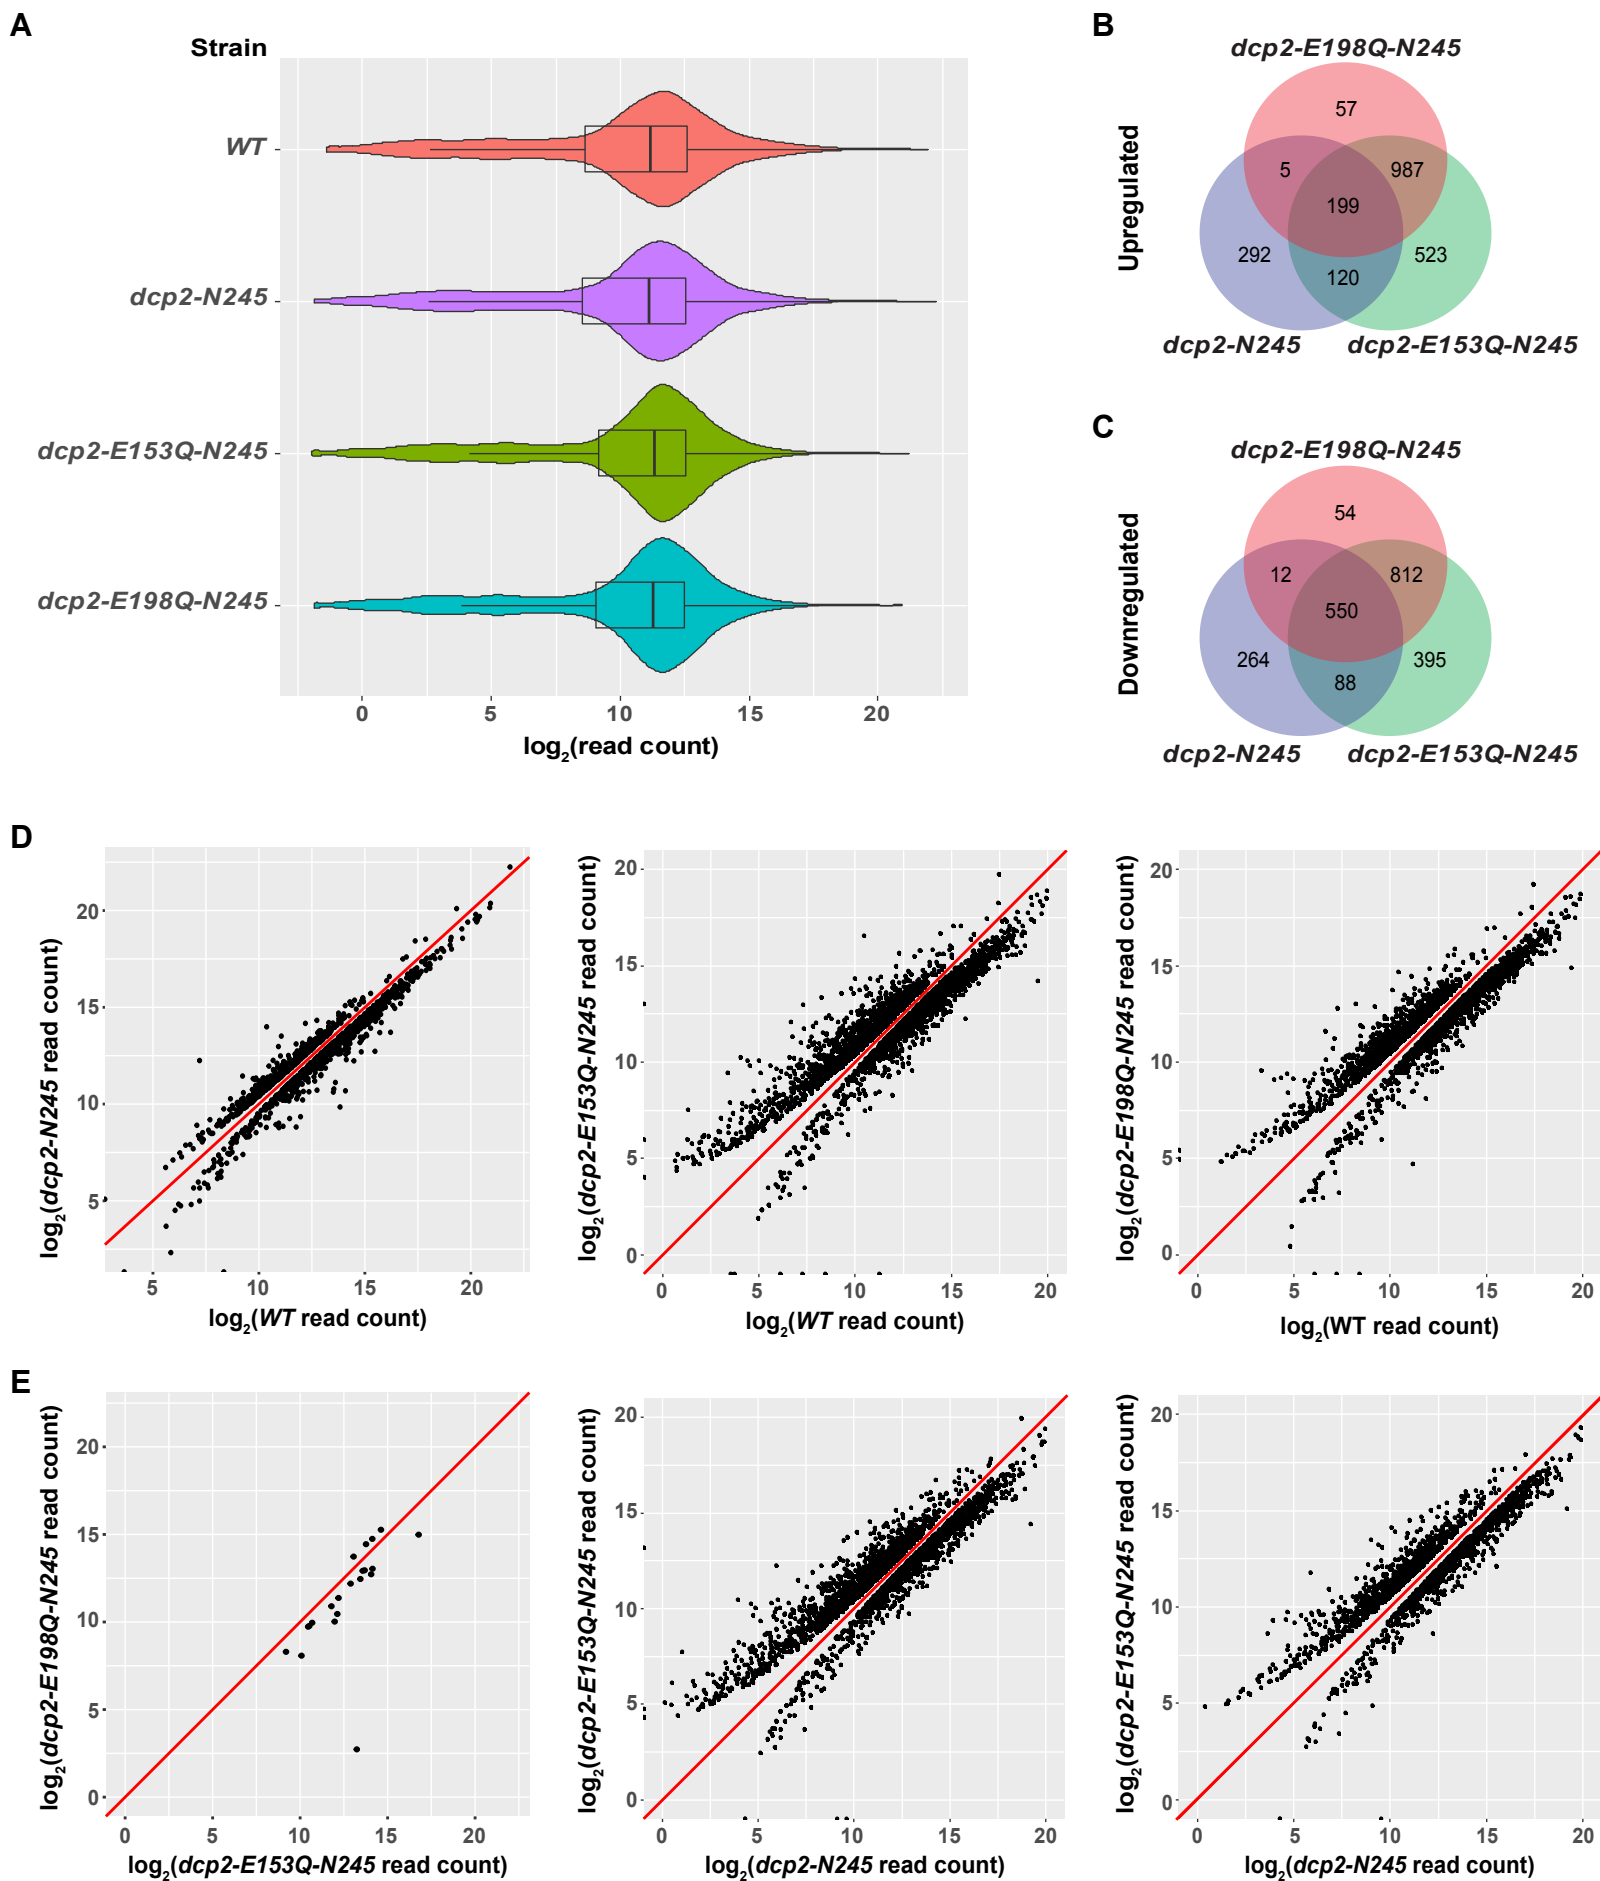

Figure 2

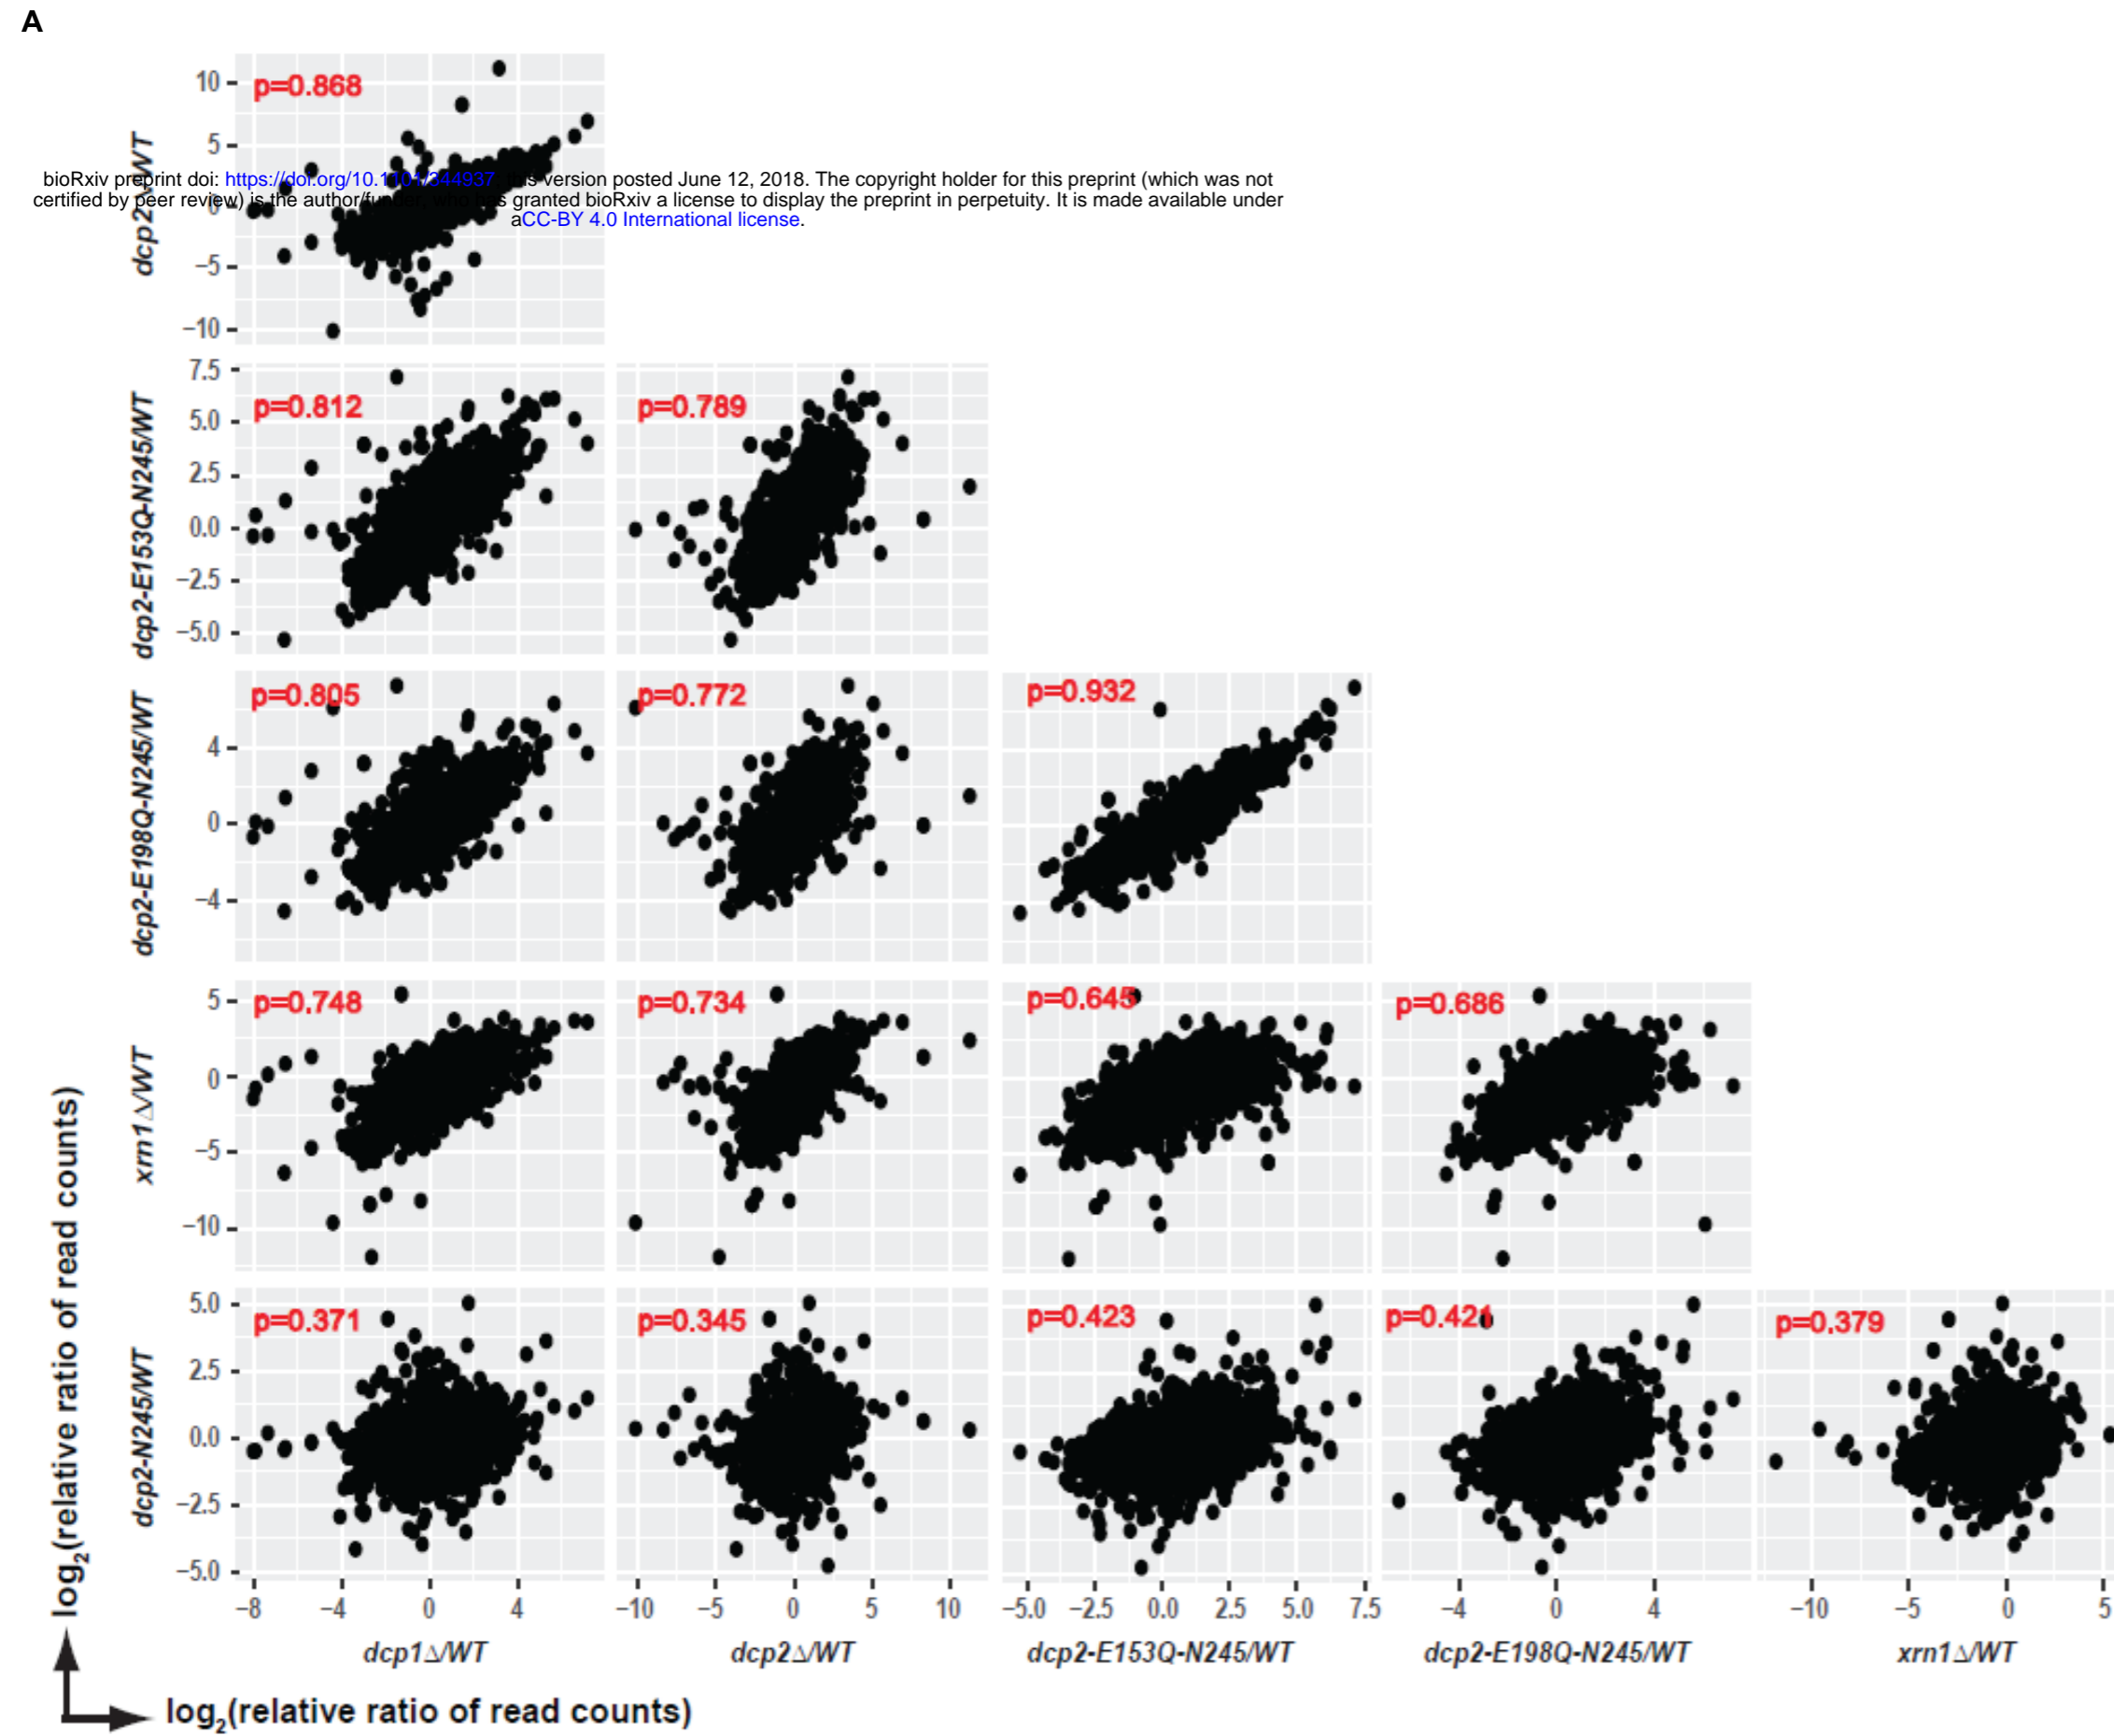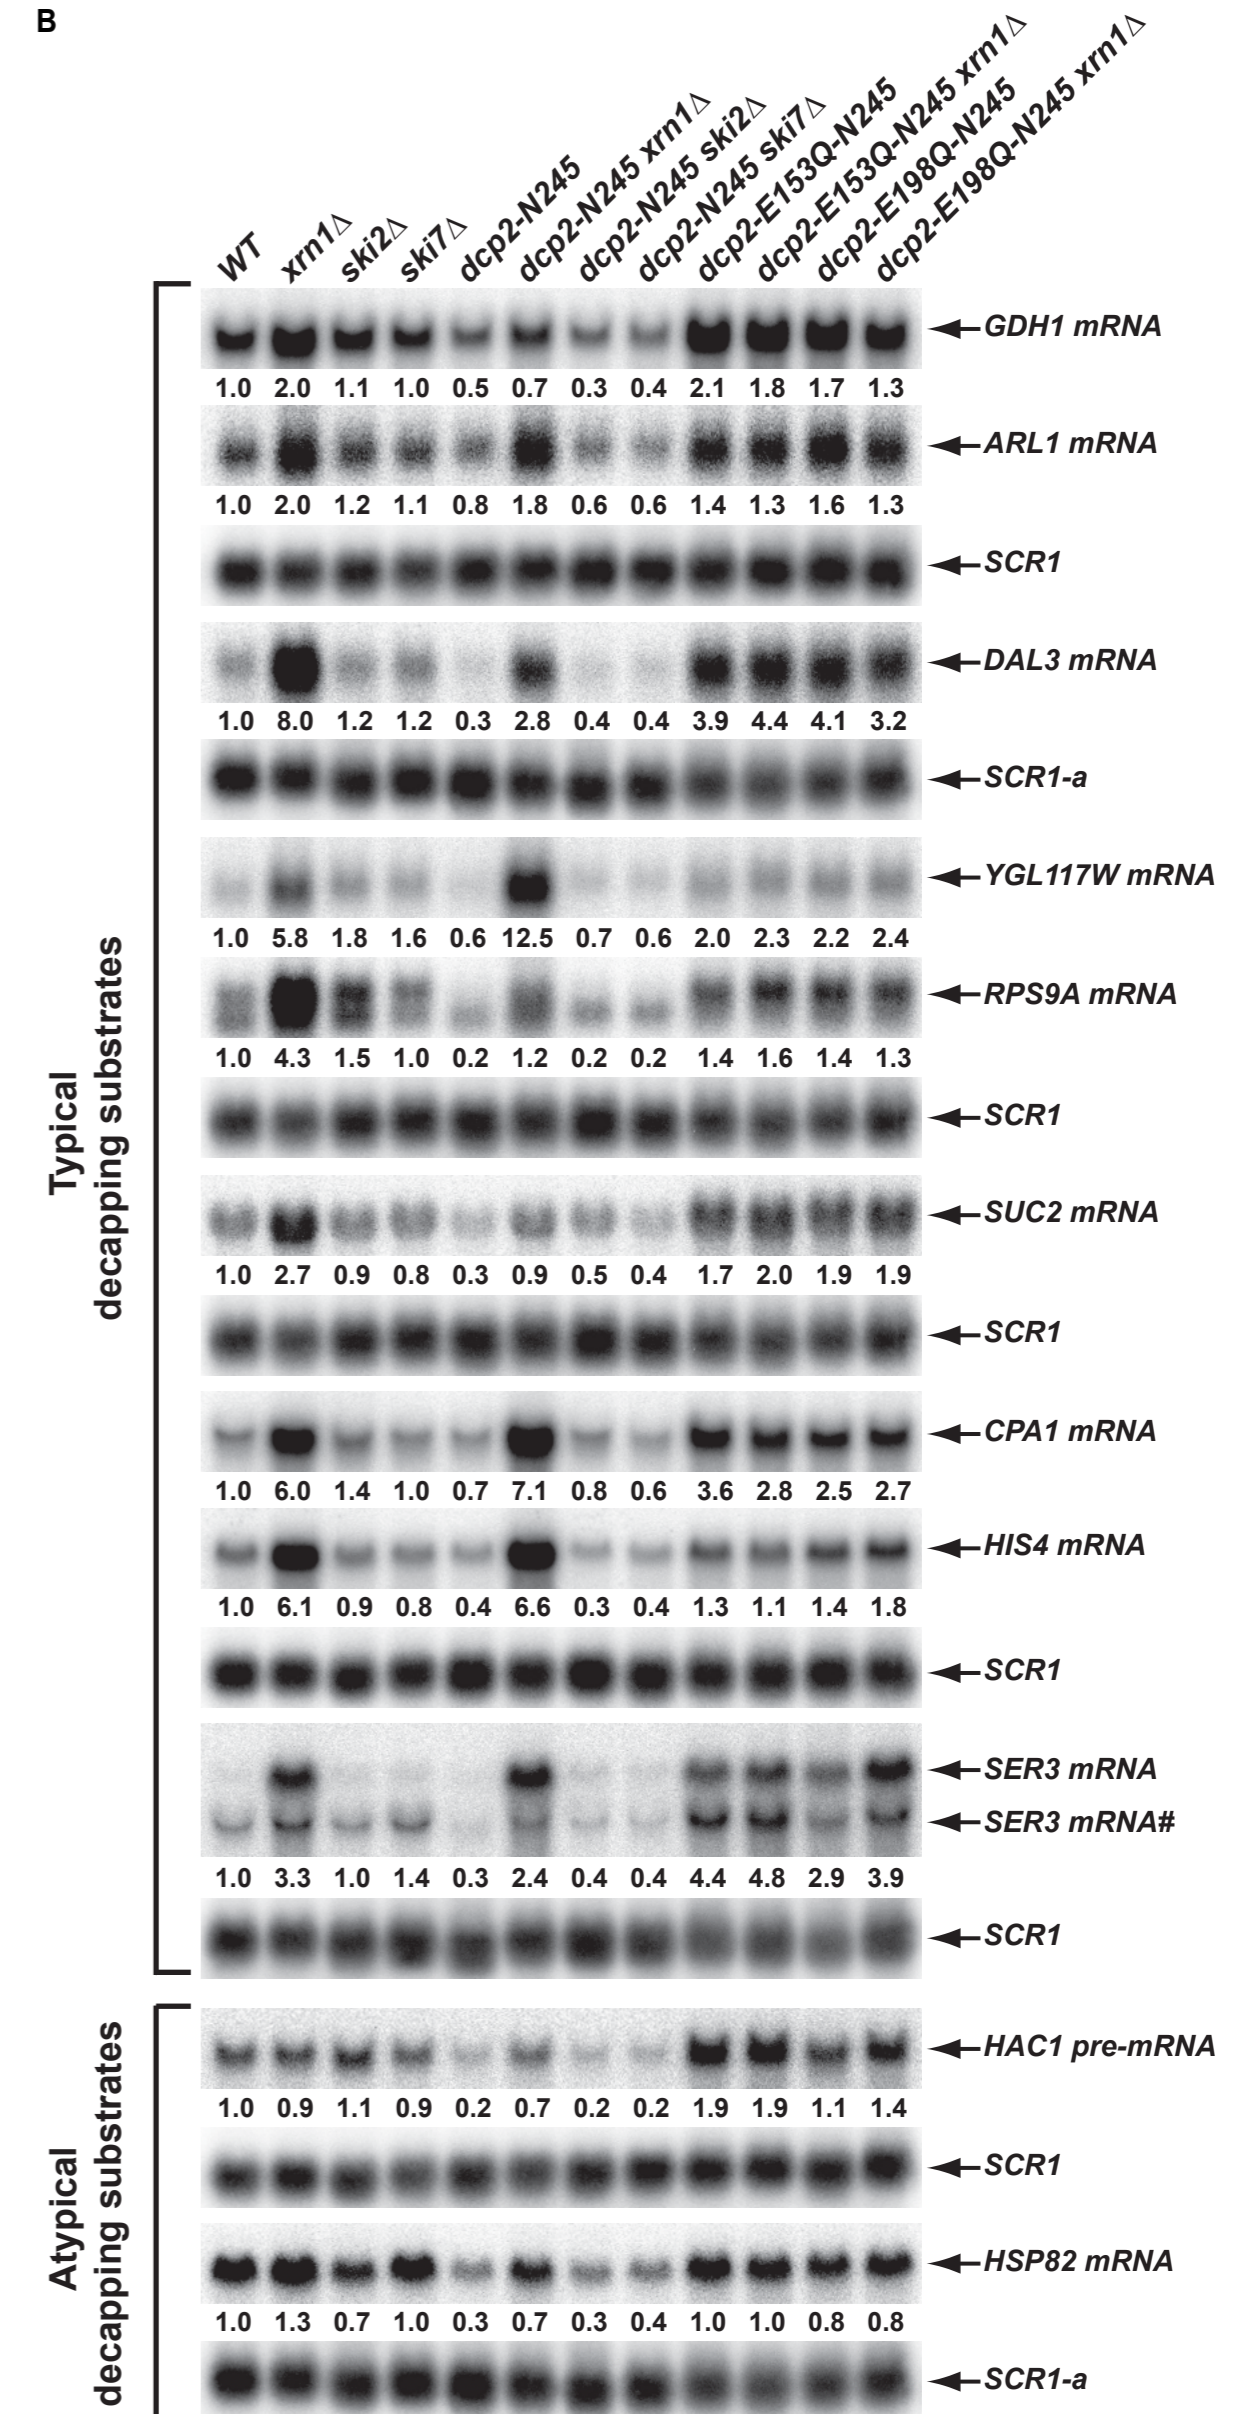







**Figure 3**

**A** bioRxiv preprint doi: <https://doi.org/10.1101/344937>; this version posted June 12, 2018. The copyright holder for this preprint (which was not certified by peer review) is the author/funder, who has granted bioRxiv a license to display the preprint in perpetuity. It is made available under aCC-BY 4.0 International license.

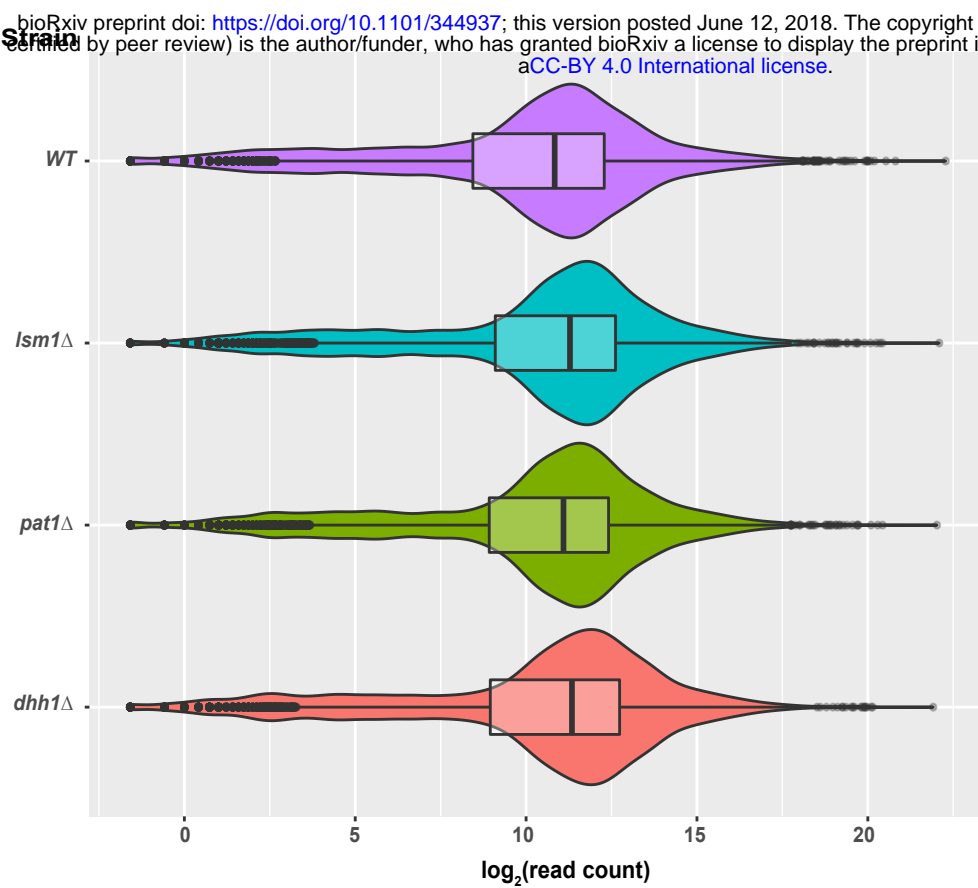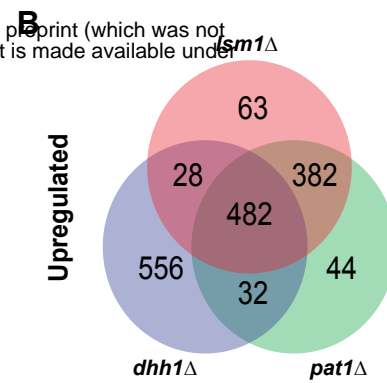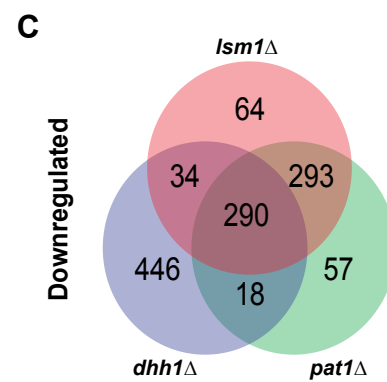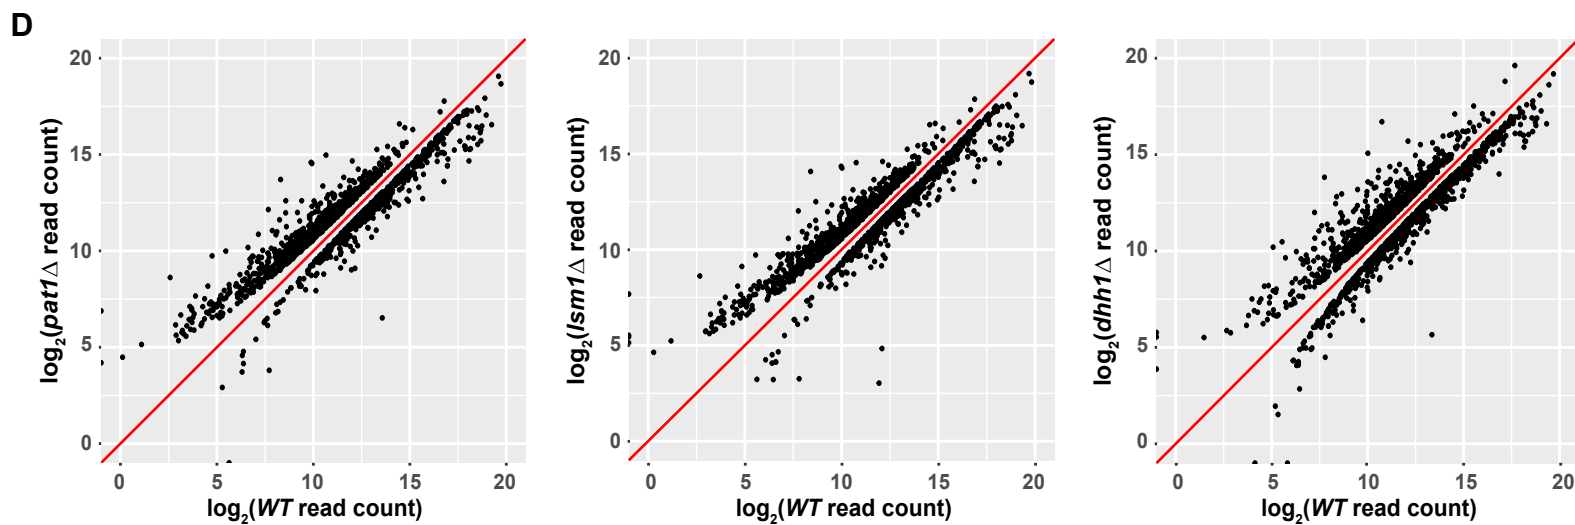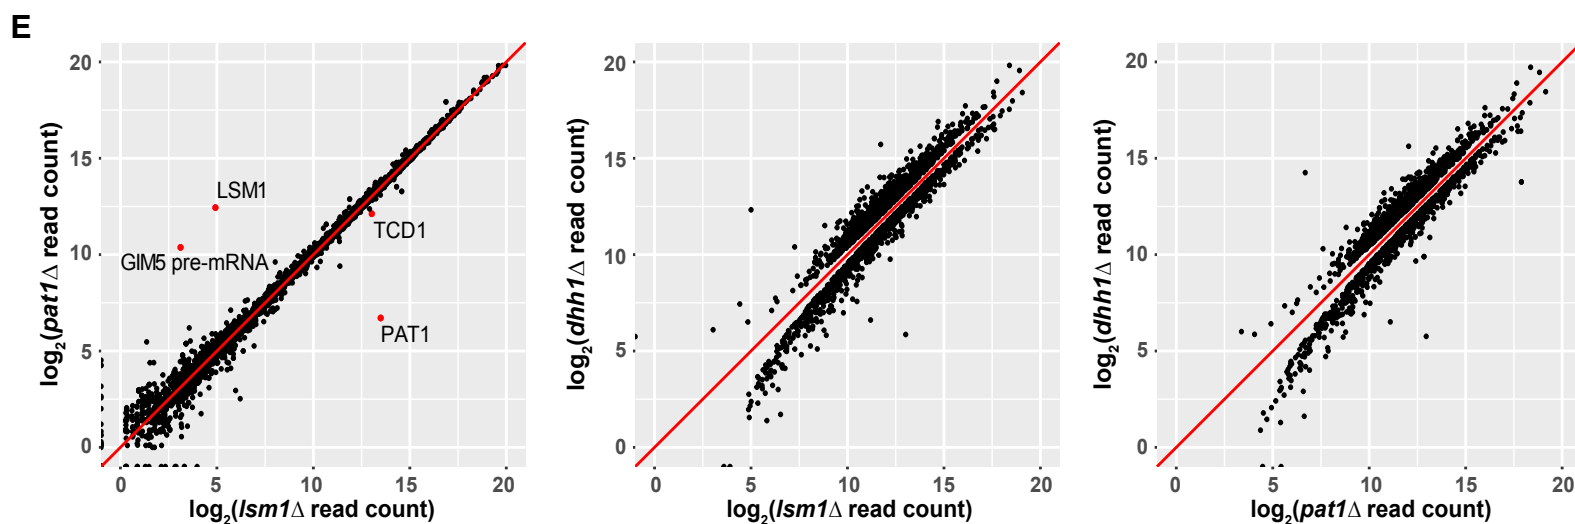

**Figure 4**

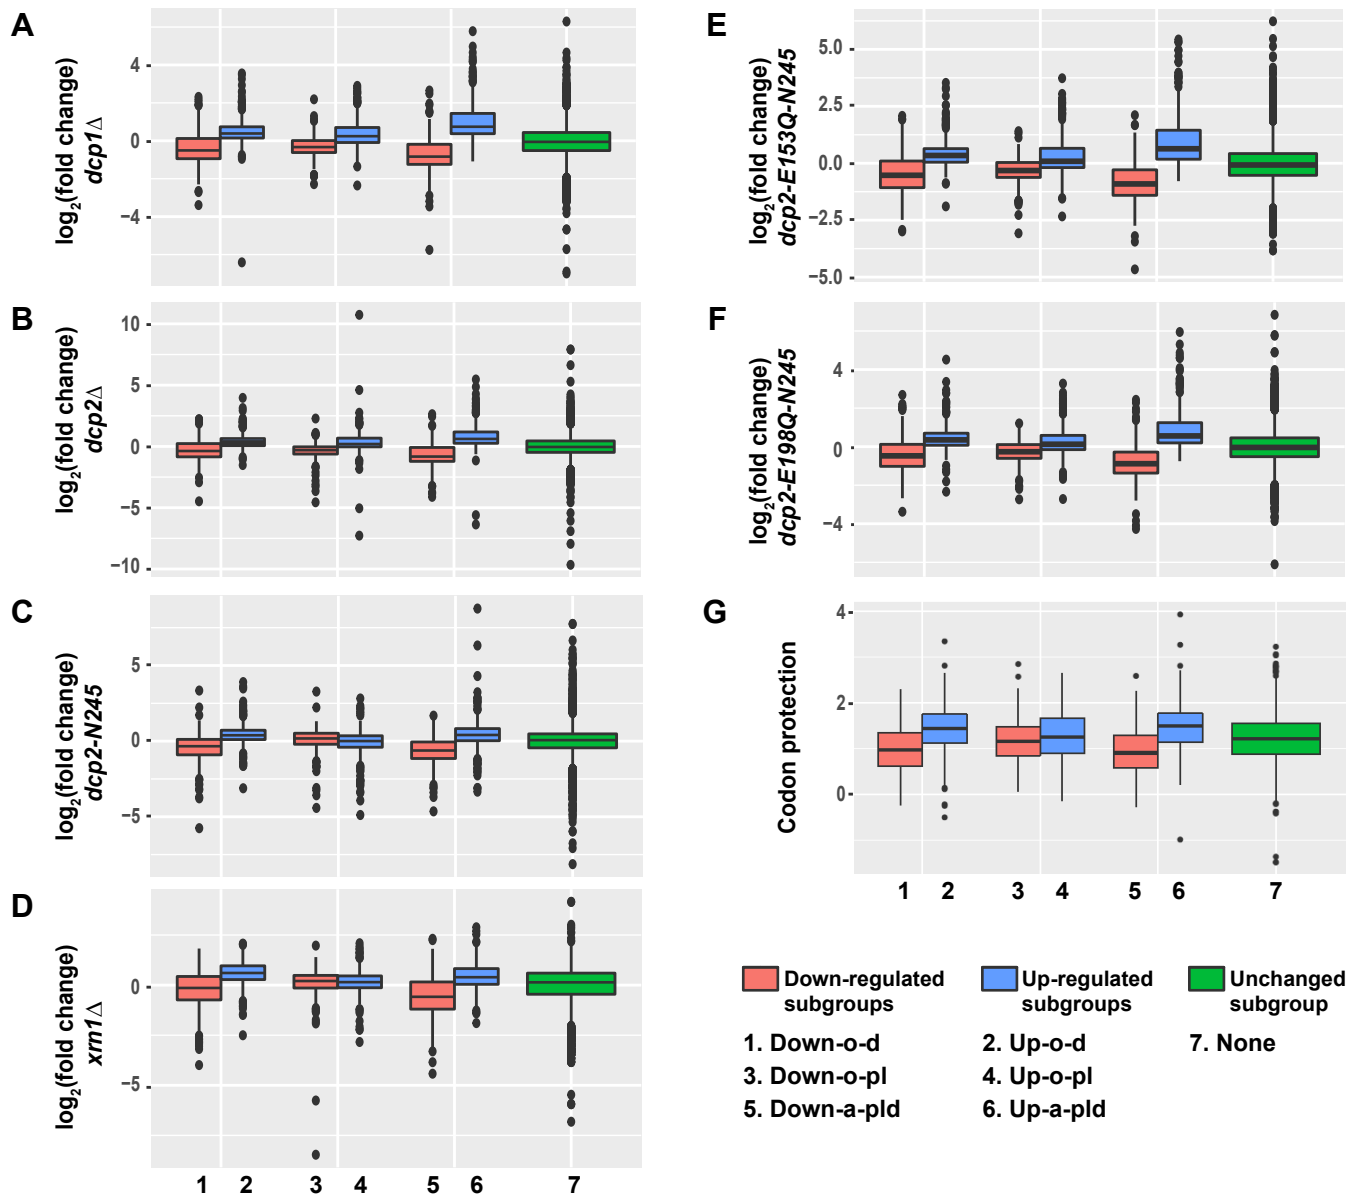



# Figure 6

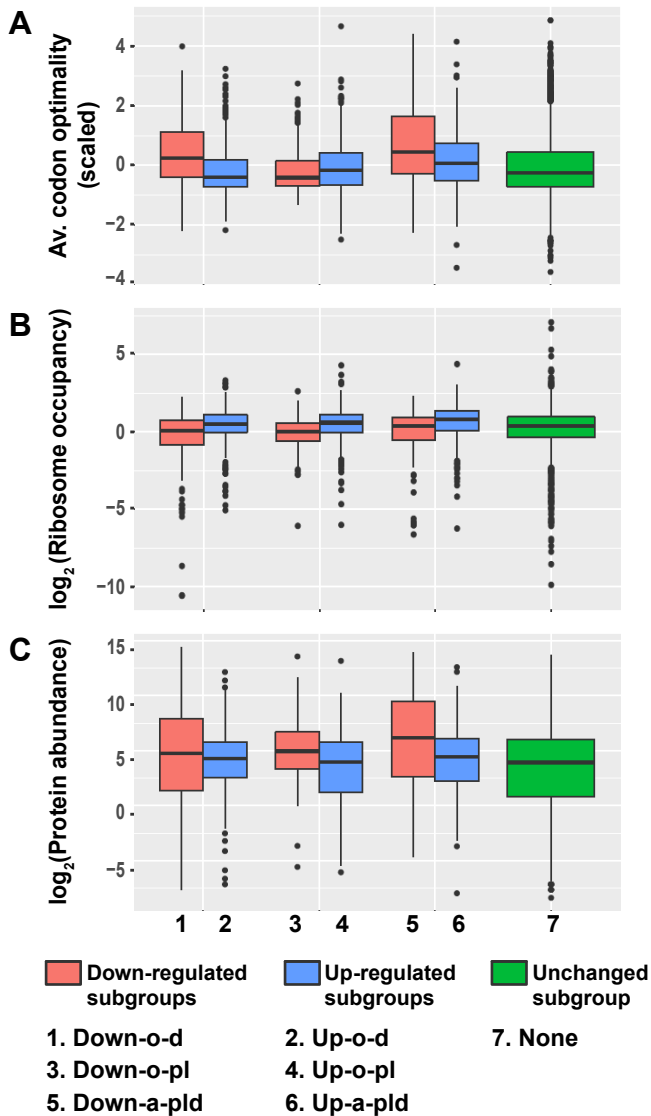

**Figure 7**

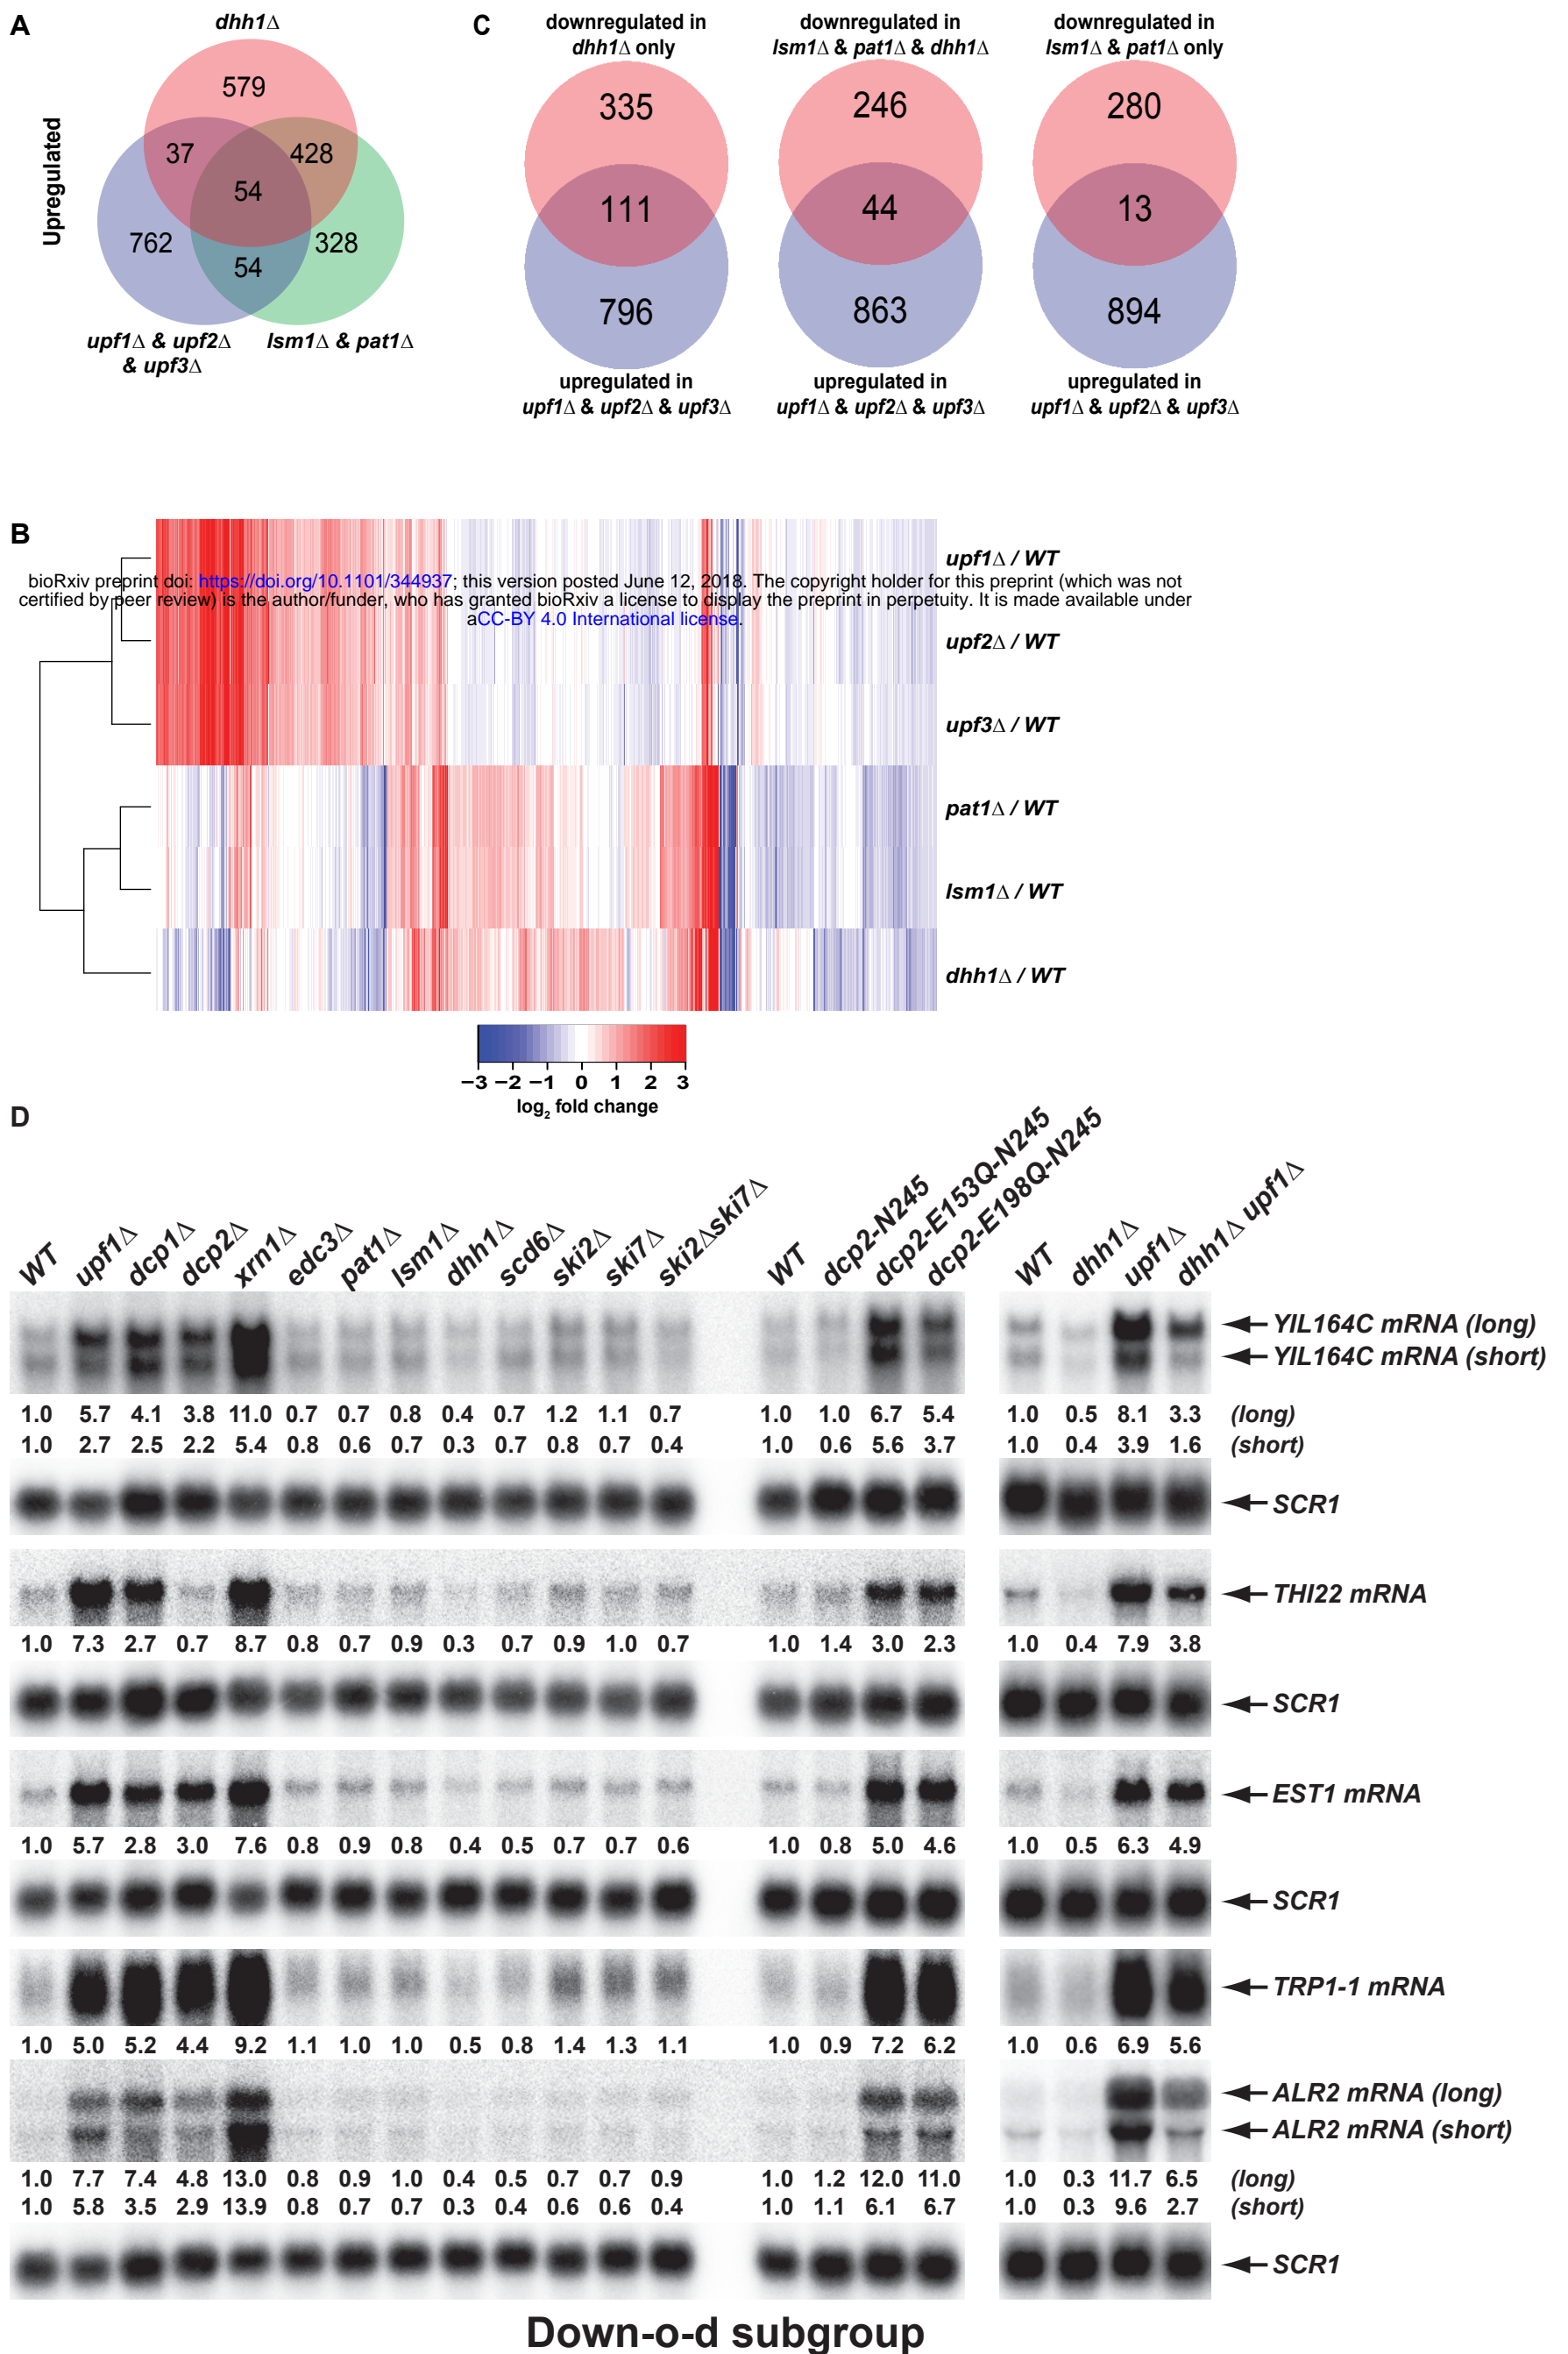

Figure 1-figure supplement 1

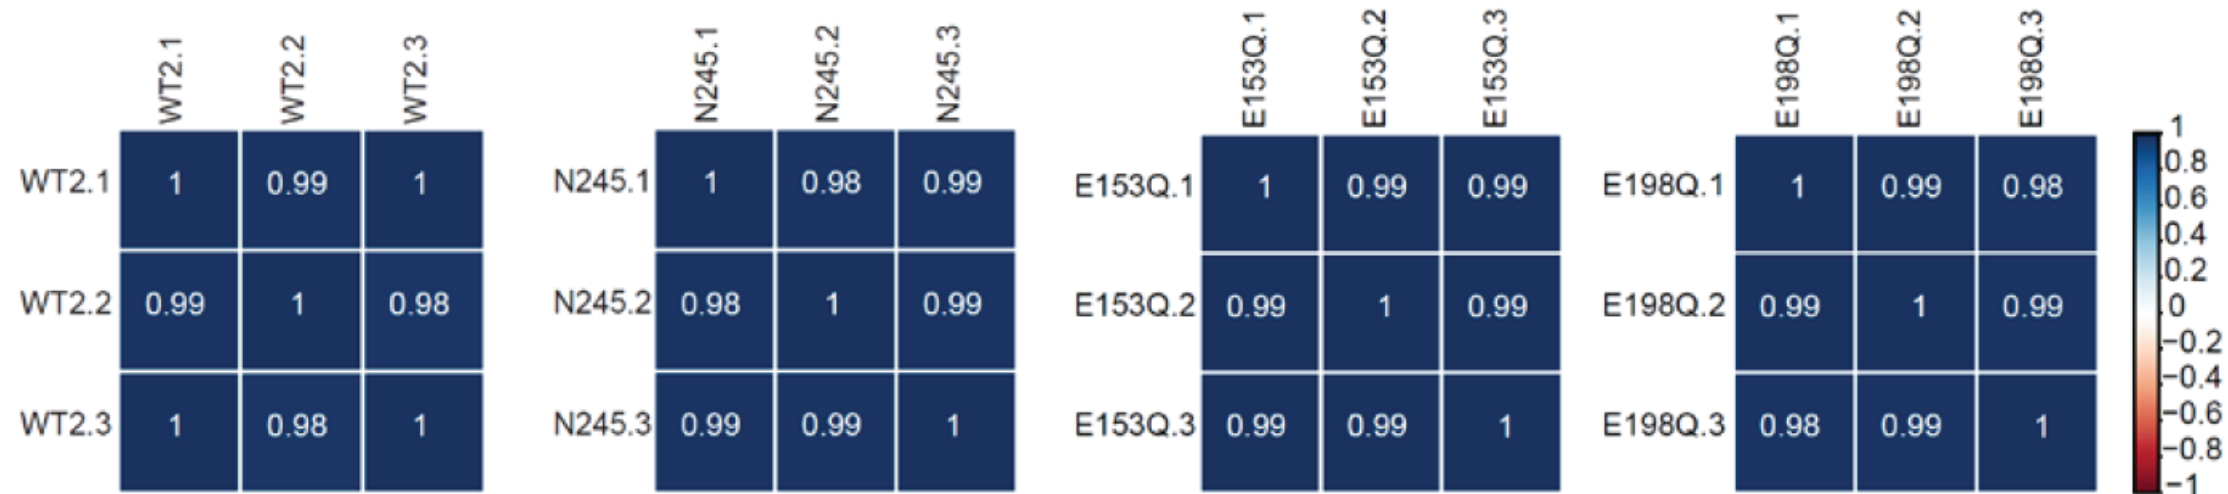

Figure 1-figure supplement 2

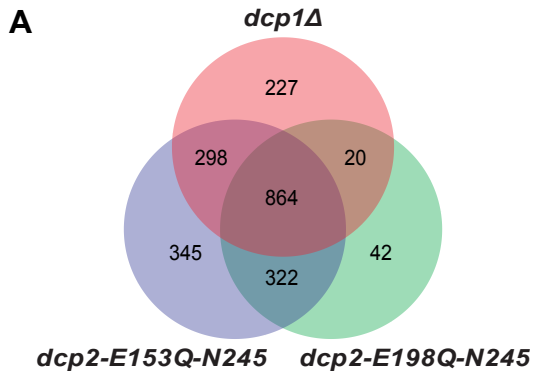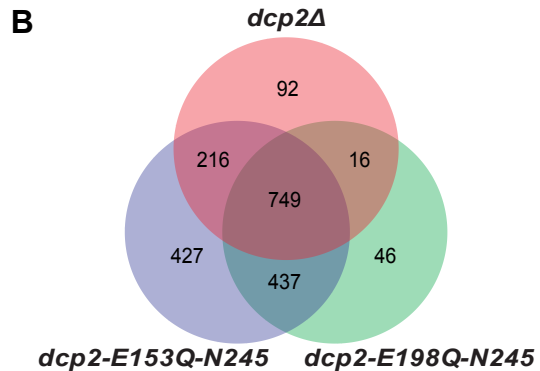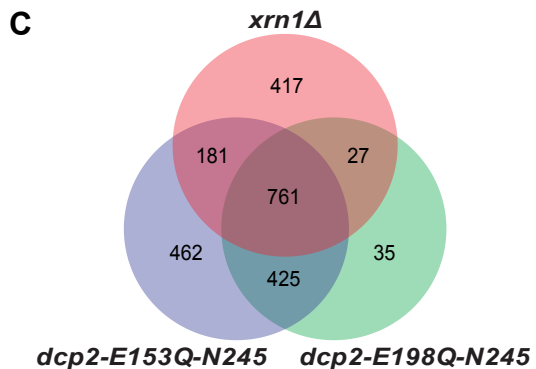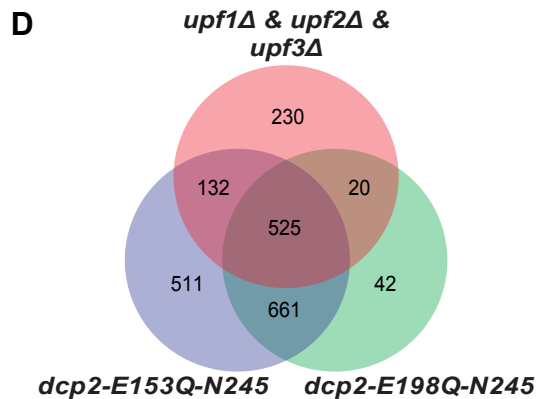



Figure 1-figure supplement 3

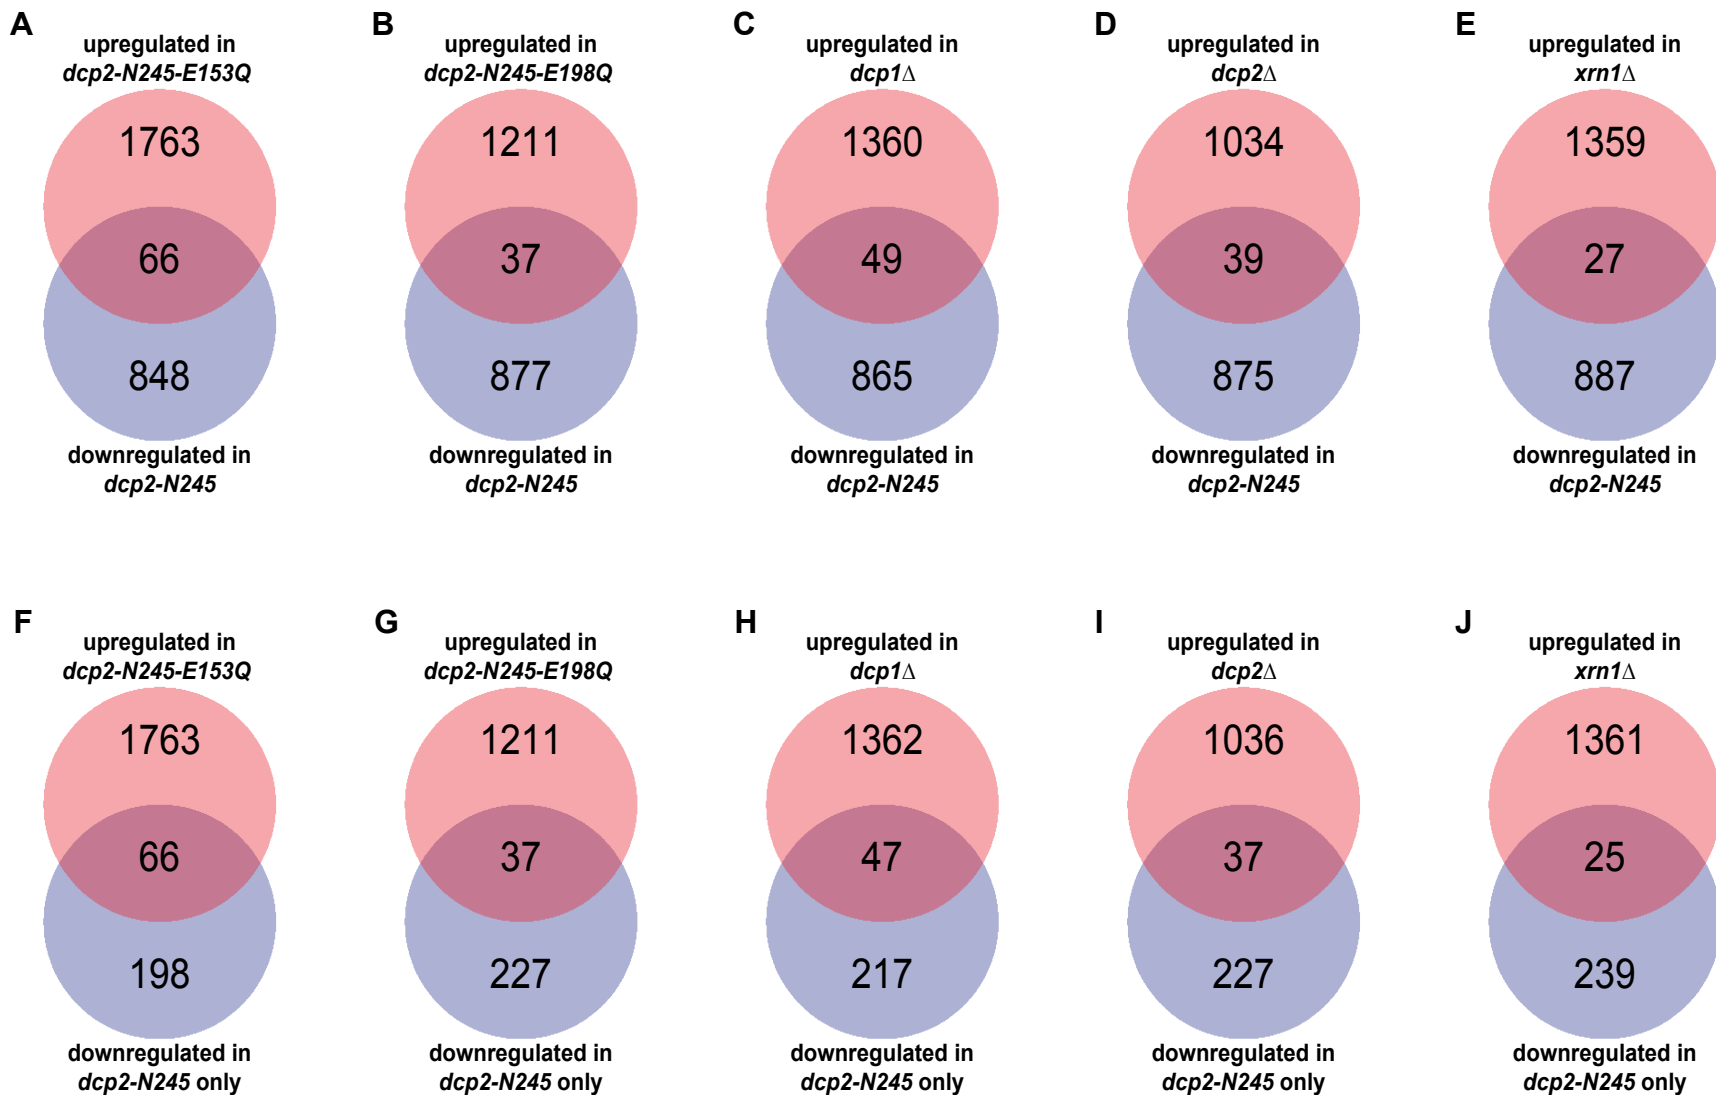

Figure 3-figure supplement 1

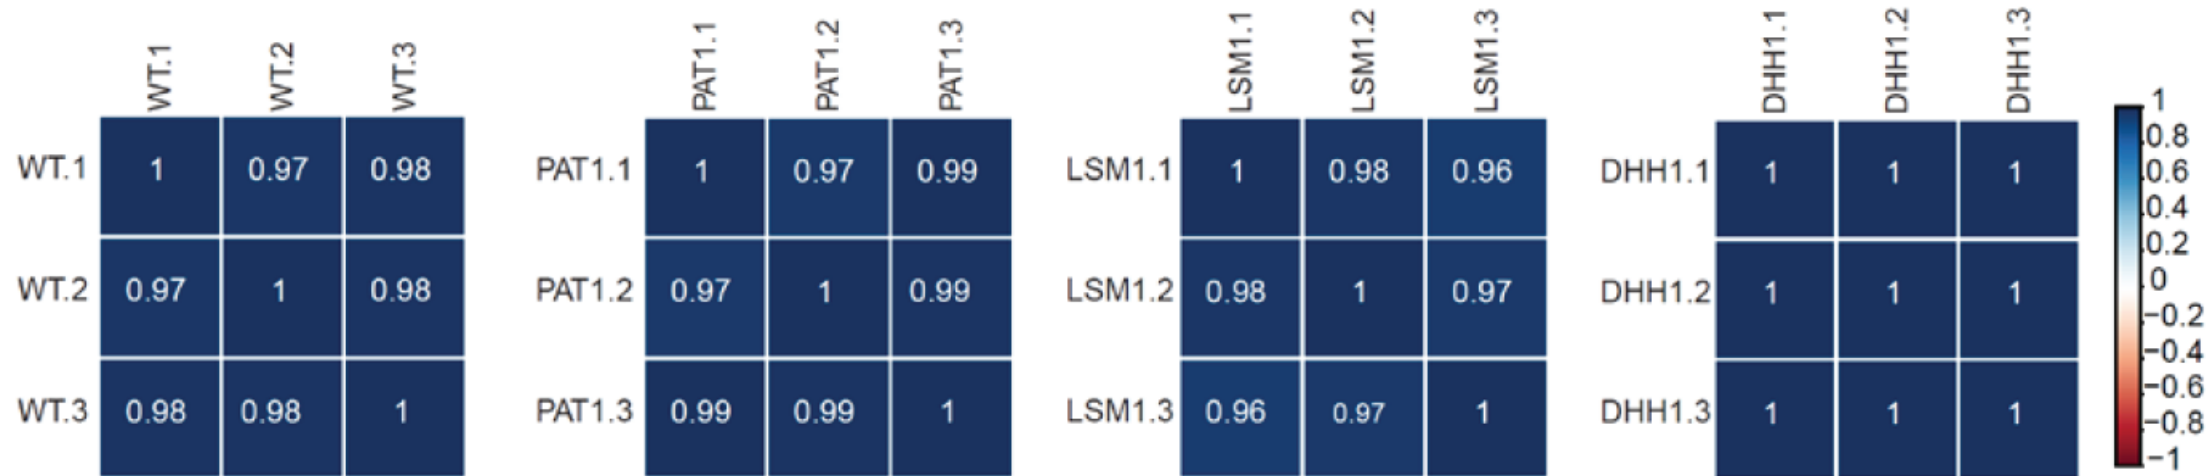

## Supplementary Table 1. Yeast strains used in this study

| Name    | Genotype                                                                                           |
|---------|----------------------------------------------------------------------------------------------------|
| HFY114  | <i>MATa ade2-1 his3-11,15 leu2-3,112 trp1-1 ura3-1 can1-100</i>                                    |
| SY2385  | <i>MATa ade2-1 his3-11,15 leu2-3,112 trp1-1 ura3-1 can1-100 dcp2-N245::KanMX6</i>                  |
| SY2887  | <i>MATa ade2-1 his3-11,15 leu2-3,112 trp1-1 ura3-1 can1-100 dcp2-N245::KanMX6 xrn1::ADE2</i>       |
| SY2889  | <i>MATa ade2-1 his3-11,15 leu2-3,112 trp1-1 ura3-1 can1-100 dcp2-N245::KanMX6 ski2::URA3</i>       |
| SY2893  | <i>MATa ade2-1 his3-11,15 leu2-3,112 trp1-1 ura3-1 can1-100 dcp2-N245::KanMX6 ski7::URA3</i>       |
| SY2750  | <i>MATa ade2-1 his3-11,15 leu2-3,112 trp1-1 ura3-1 can1-100 dcp2-E153Q-N245::KanMX6</i>            |
| SY2897  | <i>MATa ade2-1 his3-11,15 leu2-3,112 trp1-1 ura3-1 can1-100 dcp2-E153Q-N245::KanMX6 xrn1::ADE2</i> |
| SY2755  | <i>MATa ade2-1 his3-11,15 leu2-3,112 trp1-1 ura3-1 can1-100 dcp2-E198Q-N245::KanMX6</i>            |
| SY2901  | <i>MATa ade2-1 his3-11,15 leu2-3,112 trp1-1 ura3-1 can1-100 dcp2-E198Q-N245::KanMX6 xrn1::ADE2</i> |
| SY2674  | <i>MATa ade2-1 his3-11,15 leu2-3,112 trp1-1 ura3-1 can1-100 pat1::KanMX6</i>                       |
| SY2680  | <i>MATa ade2-1 his3-11,15 leu2-3,112 trp1-1 ura3-1 can1-100 lsm1::KanMX6</i>                       |
| SY2686  | <i>MATa ade2-1 his3-11,15 leu2-3,112 trp1-1 ura3-1 can1-100 dhh1::KanMX6</i>                       |
| HFY871  | <i>MATa ade2-1 his3-11,15 leu2-3,112 trp1-1 ura3-1 can1-100 upf1::HIS3</i>                         |
| SY2700  | <i>MATa ade2-1 his3-11,15 leu2-3,112 trp1-1 ura3-1 can1-100 upf1::HIS3 dhh1::ADE2</i>              |
| HFY1067 | <i>MATa ade2-1 his3-11,15 leu2-3,112 trp1-1 ura3-1 can1-100 dcp1::URA3</i>                         |
| CFY1016 | <i>MATa ade2-1 his3-11,15 leu2-3,112 trp1-1 ura3-1 can1-100 dcp2::HIS3</i>                         |
| HFY1080 | <i>MATa ade2-1 his3-11,15 leu2-3,112 trp1-1 ura3-1 can1-100 xrn1::ADE2</i>                         |
| CFY25   | <i>MATa ade2-1 his3-11,15 leu2-3,112 trp1-1 ura3-1 can1-100 edc3::URA3</i>                         |
| SY2352  | <i>MATa ade2-1 his3-11,15 leu2-3,112 trp1-1 ura3-1 can1-100 scd6::KanMX6</i>                       |
| HFY1170 | <i>MATa ade2-1 his3-11,15 leu2-3,112 trp1-1 ura3-1 can1-100 ski2::URA3</i>                         |
| SY17    | <i>MATa ade2-1 his3-11,15 leu2-3,112 trp1-1 ura3-1 can1-100 ski7::URA3</i>                         |
| SY21    | <i>MATa ade2-1 his3-11,15 leu2-3,112 trp1-1 ura3-1 can1-100 ski2::URA3 ski7::ADE2</i>              |

## Supplemental Table 2. Plasmids used in this study

| Name     | Allele                               | Description                                                                                                                                                      |
|----------|--------------------------------------|------------------------------------------------------------------------------------------------------------------------------------------------------------------|
| HFE2095  | Bs-Ks- <i>xrn1::ADE2</i>             | Contains the <i>xrn1::ADE2</i> null allele as a <i>NotI-SalI</i> fragment                                                                                        |
| HFE2289  | Bs-Ks- <i>ski2::URA3</i>             | Contains the <i>ski2::URA3</i> null allele as a <i>NotI-SalI</i> fragment                                                                                        |
| HFSE26   | Bs-Ks- <i>ski7::URA3</i>             | Contains the <i>ski7::URA3</i> null allele as a <i>NotI-SalI</i> fragment                                                                                        |
| HFSE28   | Bs-Ks- <i>ski7::ADE2</i>             | Contains the <i>ski7::ADE2</i> null allele as a <i>NotI-SalI</i> fragment                                                                                        |
| HFSE1387 | Bs-Ks- <i>dhh1::ADE2</i>             | Contains the <i>dhh1::ADE2</i> null allele as a <i>NotI-SalI</i> fragment                                                                                        |
| HFSE1066 | Bs-Ks- <i>scd6::KanMX6</i>           | Contains the <i>scd6::KanMX6</i> null allele as a <i>NotI-SalI</i> fragment                                                                                      |
| HFSE1147 | Bs-Ks- <i>dcp2-N245-KanMX6</i>       | Described previously in He and Jacobson (2015)                                                                                                                   |
| HFSE1581 | Bs-Ks- <i>dcp2-E153Q-N245-KanMX6</i> | Contains the <i>dcp2-E153Q-N245</i> allele as a <i>NotI-XhoI</i> fragment, same as HFSE1147 but contains glutamic acid to glutamine change at codon position 153 |
| HFSE1583 | Bs-Ks- <i>dcp2-E198Q-N245-KanMX6</i> | Contains the <i>dcp2-E153Q-N245</i> allele as a <i>NotI-XhoI</i> fragment, same as HFSE1147 but contains glutamic acid to glutamine change at codon position 198 |

### Supplementary Table 3. Oligonucleotides used in this study

| Name        | Sequences                           |
|-------------|-------------------------------------|
| CIT2-1-F    | ATGACAGTTCCTTATCTAAATTCAAACAGA      |
| CIT2-500-R  | GCAGTTACAGCAATAGAGAA TTGAGCCATT     |
| SDS23-1-F   | ATGCCTCAAAA TACAAGACACACGTCCATC     |
| SDS23-500-R | ATCTTGTCGTTGCTCACCTTGATCCTGTTT      |
| HOS2-1-F    | ATGTCTGGAACA TTTAGTTA TGATGTGAAA    |
| HOS2-500-R  | CCAGA TGGACTA TTCTTTTTT GCA TGA TGA |
| PYK2-1-F    | ATGCCAGAGTCCAGA TTGCA GAGACTAGCT    |
| PYK2-500-R  | ACCCTTAAATTA GATTCGTCAA TGATTTGG    |
| DIF1-1-F    | ATGGACGCACA AACTGGAATGGGCAAGCAGC    |
| DIF1-400-R  | AAAGTCTTCTCTTGGATCCA TTAACCA TTG    |
| AGA1-1-F    | ATGACATTA TCTTTCGCTCATTTTACCTAC     |
| AGA1-500-R  | GAGATTA TAGAGGCACTTGATGGTTCAA TG    |
| BUR6-1-F    | ATGGCAGATCAAGTACCA GTTACAACACAA     |
| BUR6-429-R  | TCA GGCACTCTCTTCTCCGGTTG TGT TTTGG  |
| LSM3-1-F    | ATGGAGACACCTTTGGA TTTA TTGAAACTC    |
| LSM3-270-R  | TTATA TCTCCACTGCGCCATCGTCACTTTC     |
| HXT6-1-F    | ATGTCAACAAGACGCTGCTATTGCA GAGCAA    |
| HXT6-470-R  | ATACCGA TGA TGTAGA TGACAACAACGACA   |
| GPH1-1F     | ATGCCGCCA GCTAGTACTA G TACTACCAAT   |
| GPH1-500-R  | TCA TCCAAA GCCCCTTTAA TCA TTTCTCTT  |
| HXK1-60-F   | AAGGAA TTGATGGA TGAAATTCA TCA GTTG  |
| HXK1-480-R  | TGGGTA CGAGAA GGTGAAA CCTAA TGGTAA  |
| CHA1-1-F    | ATGTGATA GTCTACAATAAAA CACCATTA     |
| CHA1-500-R  | TGTTGCGATTTCAAATCTTG TACTATTTCA     |
| RTC3-1-F    | ATGTCTACTGTAA CCAAA TACTTTTACAAG    |
| RTC3-336-R  | TCAA TTGTAGGCTTTGGTTCGGCGTTACC      |
| NQM1-481-F  | AAGCATGGTATTCA TTGTAATA TGACATTA    |
| NQM1-1002-R | TCACATTTTTTCTTCA ACCAGTTTG TACAG    |
| PGM2-1201-F | TTGAA CATCTTGGCCATTTA CAACAAGCAT    |
| PGM2-1710-R | TTAAGTACGAA CCGTTGGTCTTCA GTTCC     |
| TMA10-1-F   | ATGACCA GAACTA GCAAA TGGACA GTCCAC  |
| TMA10-260-R | TAGATGTGGTATTGTTGCAAA TCAGAAAGC     |
| GAD1-1-F    | ATGTTACA CAGGCACGTTCTAAGCAGAAG      |
| GAD1-480-R  | CAACA TGA TTGCCTCACTAGA ACCTGTGGT   |
| SPG4-1-F    | ATGGGTA GTTTTTGGGACGCA TTCGCA GTA   |
| SPG4-340-R  | TTACTTTA TTGTCGGG TCCCCCTCTCA       |
| MUP3-1-F    | ATGGAA CCGCTGCTTTTTAA TAGTGGGAAA    |
| MUP3-500-R  | ACGATAGA TCCCGTCAA TGCA TAGCCAGTT   |
| GTT2-1-F    | ATGAA TGGCAGAGGTTTCCTGATTTACAA      |
| GTT2-500-R  | TCAAAA TAATGCA TTCCA TGTA GGGCTTTG  |
| RPP1A-1-F   | ATGTCTACTGAA TCCGCTTTGTCTTACGCC     |
| RPP1A-321-R | CTAA TCAAAA TAAACCGAA ACCCATGTGCTC  |
| TMA19-1-F   | ATGATTA TTTACAAGGATA TCTTCTCTAAC    |
| TMA19-500-R | ATCTTTTCTTCCACAA TACCGTGCTTCCAG     |
| GPD2-1-F    | ATGCTTGCTGTCA GAAGATTAACAAGATAC     |
| GPD2-500-R  | GCACCCTTGA TGGAGTGTA AAAAGATCAGGA   |

|                       |                                                |
|-----------------------|------------------------------------------------|
| YIL164C-F             | AAGGGAGGAGTATGCTAAGTATCT                       |
| YIL164C-R             | CTAAATAGGCCTAGCATCCACCGT                       |
| THI22-F               | GATTAATGTGAGAGTTTGCTGCGTC                      |
| THI22-R               | GCGGTCCAGAAATTAGTTTCTAAT                       |
| EST1-F                | GAAATGTGTTCTGCGAATTAGATCA                      |
| EST1-R                | AGGAGTATCTGGCACTTGGACGGT                       |
| TRP1-1-F              | ATGTCTGTATTAAATTTCAACGGTAGTTCT                 |
| TRP1-675-R            | CTATTTCTTAGCATTTTTGACGAAATTTGC                 |
| ALR2-1-F              | ATGTCGTCCCTTATCCACTTCAATTTGATTCAT              |
| ALR2-500-R            | TTGCATCTGTACTTGACGTACCGGCAAGGT                 |
| GDH1-F                | GAAACTGGTATCACCTCCGAAACAAGTCGC                 |
| GDH1-R                | TTAAAAATACATCACCTTGGTCAAAACATAGC               |
| ARL1-F                | ATGGGTAAACATTTTTAGTTCAATGTTTGAC                |
| ARL1-R                | CTATAACTGTTCTCTTTTATAACATCAAT                  |
| DAL3-F                | ATGGTGACCGTGGTGGCGGAGACATTGACG                 |
| DAL3-R                | TTAGATGATAATACAAACGTCGCCATCGCT                 |
| YGL117W-F             | ATGCAGCCAAATTTCAAATAAAGATGTGGAA                |
| YGL117W-R             | TCAATAAACCTTCTATGAGTTATTTTAAG                  |
| RPS9A-Exon-F          | GAGCCCCAAGAACATATCCAAAGACTTACT                 |
| RPS9A-Exon-R          | TTATTTCTTCAATCGGCTCATCAGCTTCATC                |
| SUC2-F                | TGAACACTGAAATCAAGCTAATCCAGAGA                  |
| SUC2-R                | CTATTTTACTTCCCTTACTTGGAACTTGTCT                |
| CPA1-F                | TATGATTACAGAAATCAAGATGTTGCTTCT                 |
| CPA1-R                | TTAGAACAACTCTTTCCCTTGGCCAACTT                  |
| SER3-F                | CCACAAATTTGCTGCTATGAAGGATGGCGCT                |
| SER3-R                | TTAATAATAGCAATCTAATGAGATCTTAGC                 |
| HAC1-I-662-F          | CCGTGATTACGATGACCAAGGAACTACAGT                 |
| HAC1-I-913-R          | CGGACAGTACAAAGCAAGCCGTCCATTTCTT                |
| HSP82-F               | ACTCAATGAAAGGAAATCGAAAGGTAATACT                |
| HSP82-R               | CTAACTACCTCTTCCATTTCCGGTGTCAAGC                |
| XRN1-DS5              | CGCCACCGCAGAGCAAGTAACAACAGAGAC                 |
| XRN1-DS6              | ACTGCCTCGAGTCTGACGATAGAAGACCCCT                |
| SKI2-DS1              | AAATCTAGAAATTAATCTTCAACGACTGAGAAAGAA           |
| SKI2-DS2              | AGAGGATCCATAAATAGTATTAAGTACAGTAAA              |
| SKI2-DS3              | AAATGATCCATAATCGATAGAGCTCATTTATCTCAATGTGA      |
| SKI2-DS4              | TAAATCGACAATACCAATTTTCGCCTATCTTACC             |
| Ski7-1(ATG-up-500)    | AAATGCGGCGCAACTGGATATTTGATGCGCCTAGCG           |
| Ski7-2' (ATG-up)      | CGAGGAGGTGGTCTTCGAAAATTAAGATCCCGGATCGATAATT    |
| Ski7-3 (TAA-down)     | AAATATCGATCCTACAACTAAGAAATTAATACTAGGCA         |
| Ski7-4 (TAA-down-500) | TGTTTTACTTCGTCTTGACAGT TTCTGTGACAAATT          |
| DHH1-DS1              | GATCGCGGCCGCTTCGTAAAGAAAAAGACAACACAATCTTAG     |
| DHH1-DS2              | GATCCATGGAGATCTTACTACTATTTTCTTTCTTGTCGATTTTAA  |
| DHH1-DS3              | GATCCATGGGAAATTCAGAAATCTAAGAAAAAATAACTACTGTGG  |
| DHH1-DS4              | GATCGTCGACATGAAACTGGGCAAGTGCACCTTGAGCTCTT      |
| SCD6-DS1              | GATCGCGGCCGCCACATCTTCTTGTCTTCTTATTTACCA        |
| SCD6-DS2              | GATCGAAATTCATGATCTTGCCTTGTCTGTTTTTCGATGAATGCTT |
| SCD6-DS3              | GATCGAAATTCATGATGTTTTCTATGTAATAAAGTATATC       |
| SCD6-DS4              | GATCGTCGACTAACCAATTTGGCCATCAAACTTTACGAAAA      |

---
